# Supplementary material for: Machine Learning Classification of Specific Serologic Cytokines May Improve Detection of Recent, Fall Induced, Sub-Concussional Brain Changes in Geriatric Nondemented Subjects
Source: Preprints.org preprint supplement (doi:10.20944/preprints202209.0137.v1), 2022-09-09
Supplement: Supplementary file 1 [file supplementary]

## Sheet: Cytokines
Test
	CD 40 antigen (CD40) (ng/mL)	C-Reactive Protein (CRP) (ug/mL)	Eotaxin-1 (pg/mL)	FASLG Receptor (FAS) (ng/mL)	Intercellular Adhesion Molecule 1 (ICAM- (ng/mL)	Interleukin-13 (IL-13) (pg/mL)	Interleukin-16 (IL-16) (pg/mL)	Interleukin-18 (IL-18) (pg/mL)	Interleukin-3 (IL-3) (ng/mL)	Interleukin-8 (IL-8) (pg/mL)	Matrix Metalloproteinase-1 (MMP-1) (ng/ml)	Matrix Metalloproteinase-10 (MMP-10) (ng/ml)	Matrix Metalloproteinase-2 (MMP-2) (ng/mL)	Matrix Metalloproteinase-7 (MMP-7) (ng/ml)	Matrix Metalloproteinase-9 (MMP-9) (ng/mL)	Matrix Metalloproteinase-9- total (MMP-9 (ng/ml)	Neuronal Cell Adhesion Molecule (Nr-CAM) (ng/mL)	T-Cell-Specific Protein RANTES (RANTES) (ng/mL)	Superoxide Dismutase 1- Soluble (SOD-1) (ng/mL)	Tumor Necrosis Factor alpha (TNF-alpha) (pg/mL)	Vascular Cell Adhesion Molecule-1 (VCAM- (ng/mL)	Vascular Endothelial Growth Factor (VEGF (pg/mL)	Fall	Predict?
C1	-0.16749	-0.37675	2.03743	0.9345	2.02531	1.51851	2.42651	2.63246	-2.11919	0.81954	0	-1.35655	3.44871	-0.09151	2.25042	2.46687	0.6902	0.50515	1.68124	0.54407	2.8893	2.82086	n
C2	-0.14874	0.04139	1.90849	1.04139	2.01703	1.70757	2.62428	2.43616	-1.13077	0.79239	0.20412	-1.25181	3.62325	0.23045	2.40824	2.56467	0.44716	0.51851	1.60206	0.5682	2.85491	2.75358	n	y
C3	-0.21467	-0.30103	2.04922	0.94448	1.91908	1.63347	2.70329	2.35411	-1.40894	0.8451	0.25527	-1.27572	3.66558	0.04139	2.20952	2.45637	0.41497	0.47712	1.79239	0.77815	2.78604	2.81291	n	y
C4	-0.08619	-1.11919	1.98677	0.98677	2.07555	1.53148	2.48855	2.38739	-1.3098	1.07918	0.20412	-1.23657	3.79169	0.23045	2.36173	2.52634	0.54407	1.62325	1.89763	0.77815	2.98677	2.93247	n	y
C5	-0.17393	0.11394	1.78533	1.04139	2.20683	1.72428	2.40312	2.40824	-2.03621	1	0.04139	-1.30103	3.55509	0.07918	2.24797	2.46982	0.17609	1.14613	1.86332	0.92428	2.88423	2.77305	n
C6	-0.11351	-0.18709	2.23553	0.91381	2.04532	1.39794	2.44091	2.28103	-1.26761	1.36173	0.07918	-1.48149	3.63949	0.14613	2.08991	2.30535	0.32222	1.14613	1.59106	0.54407	2.78176	2.83632	n	y
C7	-0.16115	-0.45593	1.77085	1.04139	2.0607	1.63347	2.66558	2.20952	-1.26761	0.91381	0.14613	-1.52288	3.66932	0.57978	2.19866	2.29885	0.27875	0.81291	1.4624	1.04139	2.98453	2.84448	n	y
C8	-0.03152	0.25527	1.87506	1.07918	2.04922	1.54407	2.66652	2.51055	-1.4318	1.04139	0.14613	-1.42022	3.67394	0.32222	1.78533	2.04532	0.38021	1.34242	1.92942	0.88081	2.88024	2.74194	n	y
C9	-0.23657	-0.01323	1.50515	0.92428	2.08279	0.90309	2.53403	2.22531	-1.56864	0.86923	-0.23657	-1.72125	3.54407	-0.05061	2	2.26717	0.07918	1.41497	1.25527	0.91908	2.65896	2.83123	n
C10	-0.1549	-0.03621	1.79239	1.11394	1.93952	1.62325	2.5092	2.33846	-1.5376	0.96848	0.20412	-1.27572	3.50786	0.25527	2.35603	2.48855	0.39794	1.44716	1.8451	0.88081	2.86034	2.61805	n
C11	0	-0.36653	1.95904	1.11394	1.8451	1.47712	2.60531	2.34439	-1.61083	1.07918	-0.12494	-1.24413	3.79588	0.34242	2.23045	2.54407	0.4624	0.74819	1.53148	0.62325	2.91381	2.77232	n	y
C12	-0.27572	0.36173	2.0569	0.85733	1.41497	0.90309	2.48714	2.32634	-1.61979	0.5682	-0.08092	-1.42022	3.72263	0.04139	1.92428	2.23045	0.14613	0.716	1.59106	1.11394	2.65225	2.62634	n
C13	-0.284	0.74036	1.49136	0.95424	1.98677	1.6902	2.48144	2.34439	-1.76955	0.91381	-0.02687	-1.52288	3.61805	0.11394	1.95424	2.15229	0.34242	1.04139	1.54407	1.04139	2.72346	2.5977	n
C14	0.04139	0.23045	1.83251	1.07918	1.99564	1.39794	2.61595	2.48144	-1.69897	1.14613	-0.04096	-1.42022	3.43775	0.11394	2.04532	2.27875	0.11394	1.17609	1.61278	0.88081	2.96988	2.82543	n
C15	-0.284	-0.21467	1.79239	1.17609	1.88649	1.49136	2.53782	2.18184	-2.49485	0.90309	0.34242	-1.40894	3.56703	1.07918	2.10037	2.29003	0.27875	1.14613	1.43136	0.88081	2.72181	2.66652	n	y
C16	0	0.39794	1.98677	1.11394	1.99123	1.5563	2.85733	2.53148	-1.07572	1.17609	0.44716	-1.72125	3.57403	0.11394	2.02531	2.31387	0.57978	1.51851	2.10037	0.76343	2.93399	2.98	n	y
C17	0.11394	1.04139	1.76343	1.14613	2.04532	1.51851	2.80956	2.81291	-1.61083	1.44716	0.11394	-1.34679	3.37107	0.07918	2.15836	2.43457	0.39794	0.39794	1.4624	1.25527	2.92993	2.95569	n	y
C18	-0.02228	0.14613	1.78533	0.93952	1.8451	1.5563	2.63949	2.55751	-2.3098	1.07918	0.34242	-1.22185	3.6464	0.27875	2.09342	2.35603	0.39794	1.47712	1.65321	0.94939	2.84011	2.94349	n
C19	-0.27572	0.17609	2.07555	1.20412	1.85733	1.44716	2.549	2.14613	-1.82391	0.27875	0.59106	-1.38722	3.57749	0.39794	1.97772	2.1959	0.44716	1.36173	1.14613	0.5682	2.86923	2.72916	n	y
C20	-0.36653	-0.04096	2.22789	0.94939	2.01284	1	2.41162	2.3927	-1.5376	0.716	0.20412	-1.37675	3.57978	-0.14267	2.08279	2.27184	0.5563	0.39794	2.35793	0.54407	2.70501	2.44404	n
C21	-0.0655	0.38021	2.03342	1.14613	2.29226	1.54407	2.57634	2.5563	-1.61083	1.17609	0.27875	-1.33724	3.64836	0.25527	2.37475	2.52892	0.34242	1.5682	1.44716	0.8451	3.04139	2.79657	n	y
C22	-0.36653	-0.76955	1.60206	1.04139	1.93952	1.68124	2.45332	1.85733	-1.72125	1.04139	0.11394	-1.46852	3.5302	0.07918	2.02531	2.33646	0.44716	1.04139	1.54407	1.14613	2.68753	2.69548	n
C23	-0.38722	0.14613	1.78533	0.99564	1.85126	1.57978	2.51983	2.43136	-1.82391	1.04139	-0.12494	-1.40894	3.48572	0.11394	2.15534	2.42813	0.20412	0.89209	1.716	0.94939	2.83632	2.7364	n
C24	0.07918	0.11394	2.58771	1.20412	2.13672	1.23045	2.57287	2.58883	-1.5376	1.4624	1.07918	-1.11351	3.5682	0.30103	2.56703	2.59329	0.4624	1.98677	2.2833	1	3.06446	3.68485	n	y
C25	-0.1549	-0.29243	1.74036	1.11394	1.96848	1.82607	2.233	2.26951	-1.29243	0.716	-0.12494	-1.35655	3.20683	0.07918	2.22531	2.4609	0.47712	0.14613	1.43136	0.94939	2.89927	2.68485	n
C26	-0.06048	0.36173	1.62325	1.07918	1.74819	1.5682	2.39094	2.32838	-2.11919	0.83885	0.07918	-1.40894	3.93601	0.23045	2.1271	2.23045	0.25527	0	1.27875	0.74036	2.97359	2.80003	n
C27	-0.20066	-0.63827	1.47712	1.11394	1.96379	1.716	2.46538	2.47422	-1.284	0.83251	0.14613	-1.55284	3.57978	0.04139	1.85126	2.10721	0.39794	0.54407	1.38021	0.60206	2.95999	2.7332	n
C28	-0.13668	0.74036	2.37107	1.17609	2.20683	1.44716	2.59988	2.61278	-1.74473	1.20412	0.23045	-1.22915	3.74036	0.4624	2.25042	2.49969	0.36173	1.49136	1.86332	1.17609	2.7679	3.02119	n	y
C29	-0.22915	-0.74473	1.68124	0.92942	1.92942	1.65321	2.4624	2.20412	-1.14267	0.85733	-0.25181	-1.63827	3.54158	0.11394	1.88649	2.22531	0.25527	1.07918	1.85733	0.81291	2.64836	2.53529	n
C30	-0.25964	0.25527	1.79239	0.92942	1.90849	1.51851	2.33846	2.23045	-1.82391	0.90309	0.20412	-1.5376	3.37107	0.11394	2	2.30103	0.36173	1.07918	1.64345	0.38021	2.72263	2.65031	n
C31	-0.02228	-0.0655	2.16137	0.94448	2.07555	1.70757	2.33846	2.63649	-1.45593	1.17609	0.6721	-1.284	3.69108	0.23045	2.1271	2.29226	0.53148	1.78533	2.39794	1.07918	2.94151	2.81358	n	y
C32	-0.14874	0.07918	1.69897	1.07918	1.83251	1.716	2.49415	2.41664	-1.21467	0.96848	1.54407	-1.19382	3.61909	1.25527	2.10721	2.31597	0.44716	1.34242	1.79934	0.74036	2.82217	2.70329	n	y
C33	-0.02228	1.07918	1.78533	1.11394	2.05308	1.54407	2.64542	2.54777	-2.3098	1.14613	0.20412	-1.55284	3.54531	0.39794	1.85126	2.16137	0.36173	1.61278	2.03342	0.94939	2.70415	2.8202	n	y
C34	-0.25964	-0.34679	2.27416	0.99123	1.91908	1.62325	2.49276	2.30963	-1.284	1.11394	0.07918	-1.36653	3.57864	0	1.99564	2.3075	0.11394	1.54407	1.25527	0.20412	2.8293	2.68034	n	y
C35	-0.36653	0.41497	1.49136	1	2.11727	1.44716	2.57634	2.52892	-2.24413	0.90309	0.04139	-1.22915	3.44871	0.39794	2.3032	2.44871	0.41497	0.74036	1.5682	0.69897	2.94841	2.70243	n	y
C36	-0.26761	0	2.0607	1.04139	2.04922	1.50515	2.58546	2.57749	-1.55284	0.88081	0.17609	-1.16749	3.74036	0.38021	2.4216	2.5977	0.32222	0.74819	1.96379	1.11394	2.78319	2.84696	n	y
C37	-0.21467	0.32222	1.49136	0.90849	2.28103	1.69897	2.55871	2.47712	-1.92082	0.83251	0.14613	-1.52288	3.55267	0.36173	1.93952	2.16732	0.25527	0.43136	1.49136	0.98227	2.90902	2.78533	n	y
C38	-0.23657	-0.11351	2.07555	0.86923	1.63347	1.73239	2.42325	2.36922	-1.0655	0.83251	-0.14874	-0.95861	3.44716	-0.00436	2.9154	2.90363	0.11394	0.8451	1.49136	0.64345	2.79029	2.89927	n	y
C39	-0.17393	0.32222	1.62325	1.11394	2.07188	1.60206	2.4843	2.549	-1.92082	0.716	-0.14874	-1.27572	3.61278	0.04139	2.33041	2.15534	0.39794	0.41497	1.5563	0.91908	2.81558	2.74194	n
C40	-0.1549	0.27875	2.16137	0.96848	2.14922	1.72428	2.55388	2.38917	-2.03621	0.83251	0.17609	-1.46852	3.51851	0.17609	2.12057	2.30535	0.51851	1.20412	1.68124	0.79239	2.83315	3.01703	n
C41	-0.20066	-0.07572	1.66276	0.83885	1.91381	1.69897	2.32838	2	-2.46852	0.716	0.14613	-1.46852	3.20952	0.07918	1.81954	2.16137	0.11394	0.92428	1.30103	1.07918	2.63246	2.71767	n
C42	-0.1549	0.04139	2.19312	1.07918	2.16137	1.68124	2.59988	2.69984	-1.85387	0.83251	0.07918	-1.35655	3.47712	0.20412	2.1271	2.30963	0.4624	1.34242	1.86332	0.92428	2.94841	2.87622	n
C43	-0.38722	0.54407	1.98677	1	1.79239	1.53148	2.5563	2.49693	-1.60206	0.81954	0	-1.61979	3.51188	0.14613	2.11727	2.36736	0.36173	0.57978	1.74819	0.5682	2.65514	2.69108	n
C44	-0.29243	-0.82391	1.69897	0.87506	1.94448	1.77815	2.3784	2.40654	-1.10791	0.99564	-0.29243	-1.5376	3.62634	0.17609	1.49136	1.73239	0.20412	1.11394	1.49136	0.74036	2.76268	2.58433	n
C45	-0.07572	0.04139	1.72428	1.14613	2.3032	1.34242	2.45179	2.47276	-1.61083	0.716	-0.05061	-1.20761	3.52244	0.11394	2.36922	2.55871	0.32222	0.53148	1.68124	0.8451	2.97635	2.78533	n
C46	-0.18709	0.07918	1.69897	0.95904	1.88081	1.80618	2.41162	2.52892	-1.60206	1.07918	0.07918	-1.5376	3.66276	0.04139	1.91908	2.14613	0.41497	1.30103	1.65321	0.74036	2.79029	2.7332	n
C47	-0.16115	0.07918	2.15534	1.11394	1.9345	1.59106	2.55991	2.67302	-1.5376	1.14613	0.39794	-1.3279	3.63448	0.20412	1.92428	2.21219	0.30103	1.07918	1.27875	0.38021	2.90472	2.70927	n	y
C48	-0.06048	-0.12494	1.41497	1.11394	1.86332	1.79934	2.69636	2.47567	-1.25964	1.30103	0.23045	-1.48149	3.62325	0.30103	2.01703	2.34242	0.38021	1.11394	1.74036	0.94939	2.90091	2.77525	n
C49	-0.17393	-0.13077	1.79934	1.14613	2.04139	1.81954	2.48287	2.45332	-1.60206	0.87506	-0.0655	-1.21467	3.81224	0.07918	2.2833	2.44091	0.25527	0.68124	1.51851	0.17609	2.85003	2.74115	n
C50	0.04139	-0.16115	1.77815	1.07918	2.24797	1.77085	2.72509	2.44091	-1.25964	1.23045	-0.05061	-1.25181	3.58771	0.11394	2.2833	2.45788	0.34242	1.51851	2	0.98227	3.00432	2.85854	n	y
C51	-0.29243	-0.72125	1.94448	0.85126	2.00432	1.65321	2.22531	2.17898	-1.52288	0.92428	0.23045	-1.56864	3.68215	0.20412	1.66276	1.99123	0.25527	1.04139	1.17609	0.92428	2.91751	2.76716	n	y
C52	-0.11919	-0.05552	1.89763	1.07918	2.04139	1.66276	2.54033	2.44091	-1.61083	0.6721	-0.14874	-1.56864	3.58883	-0.07572	1.97772	2.26007	0.20412	0.66276	1.5563	0.64345	2.80414	2.87274	n
C53	-0.4437	-0.63827	1.86332	0.92942	1.80618	1.63347	2.51587	2.39967	-1.58503	0.88081	0.25527	-1.48149	3.49969	0.07918	1.89209	2.12385	0.38021	0.96848	1.77085	1.04139	2.71933	2.75358	n	y
C54	-0.22185	-0.4437	1.98227	1.07918	1.89763	1.54407	2.53782	2.36173	-1.42022	0.85733	0.27875	-1.4437	3.7007	0.23045	1.93952	2.07555	0.39794	1.4624	1.88081	0.81291	2.61172	2.87737	n	y
C55	0.11394	0.07918	1.79934	1.20412	1.96379	1.74036	2.31806	2.15534	-1.49485	0.96848	-0.16115	-1.18046	3.58092	-0.04096	2.07188	2.30103	0.39794	0.74819	1.41497	1.07918	2.88309	2.83315	n	y
C56	-0.27572	-0.11351	2.0569	1	1.89209	1.53148	2.42975	2.32015	-2.24413	0.44716	0.11394	-1.35655	3.41497	0.04139	2.06819	2.3075	0.27875	0.89763	1.75587	1	2.74586	2.62634	n
C57	0.04139	-0.07058	1.72428	1.14613	2.25768	1.57978	2.71349	2.77743	-1.61979	1.07918	0.14613	-1.40894	3.74741	0.27875	2.19312	2.34044	0.68124	0.95424	1.65321	1.11394	3.09691	2.94448	n	n
C58	-0.22185	-0.29243	2.0086	0.97772	2.10721	1.65321	2.7364	2.14613	-1.52288	0.86923	0	-1.52288	3.59218	-0.03621	2.08991	2.25042	0.63347	0.5563	1.62325	1.04139	3.03743	2.78462	n	n
C59	-0.23657	0.25527	1.94939	1.04139	1.99123	1.51851	2.53908	2.1959	-1.69897	1.04139	0.11394	-1.33724	3.65128	0.23045	2.07918	2.32222	0.23045	1.69897	1.43136	0.77815	2.87622	2.98722	n	n
C60	0.07918	-1	1.96379	1.27875	1.89209	1.716	2.95856	2.99957	-1.61979	1.07918	0.38021	-1.12494	3.60959	0.47712	1.93952	2.13354	0.4624	0.5563	1.74036	0.5682	2.97772	2.8014	n	y
C61	-0.03152	0.17609	1.83251	1.07918	2.18469	0.90309	2.61805	2.80482	-1.5376	1.17609	0.30103	-1.27572	3.74429	0.23045	1.98677	2.16435	0.60206	1.32222	1.74819	1.11394	3.01284	2.72591	n	y
C62	-0.00877	0.32222	1.81291	1.14613	2.07188	1.66276	2.63448	2.39094	-1.14267	1.14613	-0.09691	-1.21467	3.6981	0.36173	2.39967	2.5611	0.32222	1.27875	1.85126	0.85733	2.83885	2.85187	n	y
C63	-0.16115	-0.82391	1.74036	1.17609	2.01703	1.59106	2.81023	2.41162	-2	0.91381	-0.12494	-1.3098	3.5977	0.14613	2.24055	2.41497	0.43136	0.04139	1.41497	0.94939	2.91855	2.71349	n	n
C64	-0.17393	-0.30103	1.6721	0.9345	2.06819	1.39794	2.49554	2.58206	-1.37675	0.99564	0.36173	-1.35655	3.46389	0.20412	2.17026	2.30103	0.50515	1.39794	1.95904	0.54407	2.83251	2.49969	n	n
C65	0.04139	0.04139	1.60206	1.14613	2.09342	1.5563	2.30535	2.33846	-1.61083	1	0.04139	-1.65758	3.08636	0.07918	1.85126	2.15534	0.20412	1.53148	1.73239	0.81291	2.92891	2.66558	n	n
C66	-0.23657	-0.21467	1.95904	1.17609	1.89763	1.50515	2.89209	2.21219	-2	1	-0.02687	-1.3279	3.70927	0.14613	2.29226	2.57519	0.63347	0.69897	1.59106	1	2.85065	2.82282	n	n
C67	-0.16749	0.5682	1.14613	0.93952	1.77815	1.47712	2.32838	2.18752	-2	1.11394	-0.02687	-1.3098	3.60746	0.07918	2.27646	2.57519	0.25527	1.07918	1.81954	0.73239	2.72016	2.72016	n	n
C68	-0.09691	0.36173	1.78533	1.07918	1.95424	1.74819	2.55509	2.35025	-1.82391	1.04139	-0.02687	-1.55284	3.65321	0.25527	1.98677	2.17898	0.25527	1.20412	1.79239	1.04139	2.93852	2.67761	n	n
C69	-0.23657	0.04139	2.00432	0.98227	1.83251	1.6721	2.55145	2.22011	-1.29243	1	-0.25181	-1.48149	3.60423	0.07918	2.08636	2.38382	0.47712	0.5682	1.34242	0.81291	2.89927	2.68842	n	y
C70	-0.19382	-0.13077	1.69897	0.81291	1.85733	1.716	2.63246	2.09691	-1.52288	0.96848	0.25527	-1.25964	3.82866	0.04139	2.12385	2.4014	0.23045	0.82607	1.59106	0.17609	2.75511	2.76492	n	n
C71	-0.11919	0.73239	1.92942	1.20412	1.91381	1.51851	2.56229	2.00432	-1.61083	0.91381	-0.02687	-1.39794	3.58546	0.14613	1.85126	2.24055	0.43136	0.14613	1.41497	0.81291	2.80414	2.81757	n	n
C72	-0.20066	0.23045	2.24797	1	1.96848	1.50515	2.35025	2.44248	-1.79588	1.17609	0.25527	-1.04576	3.63246	0.20412	2.52114	2.63749	0.4624	1.54407	2.27646	0.60206	2.77379	2.96142	n	y
C73	-0.29243	0.14613	1.54407	1.14613	2.02531	1.74819	2.47422	2.40654	-1.31876	1.23045	-0.16115	-1.25964	3.68395	0.17609	2.33244	2.5302	0.17609	0.90309	1.53148	0.5682	2.72754	2.82347	n	n
C74	-0.20761	-0.03621	2.06819	1	2.24055	1.6902	2.64738	2.38021	-2.17393	0.91908	-0.00877	-1.39794	3.64147	0.30103	2.26245	2.36736	0.30103	0.30103	1.51851	1.07918	2.78319	2.7348	n	n
C75	0.07918	1.27875	2.10037	1.23045	2.17898	1.54407	2.55751	2.41162	-2.3098	1.30103	-0.02687	-1.3279	3.83123	0.49136	2.33244	2.52114	0.63347	1.5682	1.38021	0.81291	3.0086	3.09342	n	y
C76	-0.09691	0.17609	1.79934	1.11394	1.97313	1.77085	2.6149	2.44404	-1.60206	1.27875	0.04139	-1.21467	3.57403	-0.284	2.27646	2.46389	0.53148	0.97772	1.49136	0.74036	2.88874	2.77232	n	y
C77	-0.33724	0.47712	2.0086	1.04139	2.18184	1.68124	2.53656	2.37107	-2.37675	0.92428	0.14613	-1.35655	3.41996	0.07918	2.29667	2.47712	0.57978	0.75587	1.49136	1.11394	2.76343	2.80618	n	n
C78	-0.07058	0.30103	1.90849	1.07918	2.13354	1.60206	2.5611	2.49276	-2.37675	0.83251	0.25527	-1.36653	3.73719	0.25527	2.22531	2.44248	0.36173	1.25527	1.77085	0.92428	2.81558	2.93852	n	n
C79	-0.04576	0.14613	1.8451	1.07918	1.88081	1.79239	2.49693	2.29226	-1.24413	1.11394	0.07918	-1.33724	3.73799	0.25527	1.98677	2.22531	-0.08619	1.36173	1.95424	0.93952	2.97818	2.9058	n	y
C80	-0.25181	0.61278	1.81291	0.91381	2.0086	1.68124	2.53148	2.40824	-1.61083	0.96848	0.14613	-1.52288	3.5977	-0.26761	1.83885	2.08279	0.30103	0.74036	1.39794	0.20412	2.8537	2.82282	n	y
C81	-0.10791	0.20412	1.88081	1	1.90849	1.83251	2.57978	2.1959	-1.45593	1.11394	0.11394	-1.23657	3.81624	0.17609	2.35603	2.31387	0.32222	1.4624	1.6721	0.93952	2.79379	2.76492	n	y
C82	-0.01323	-0.16749	2.01284	0.97772	2.02119	1.70757	2.91009	2.68664	-1.76955	1.34242	-0.26761	-1.23657	3.58771	0.17609	2.36549	2.6637	0.34242	0.77815	1.77085	0.64345	2.85794	2.87737	n	y
C83	0.17609	0.53148	2.16732	1.25527	1.94939	1.6902	3.28556	2.80889	-1.63827	1.32222	-0.49485	-1.21467	3.66276	0.07918	2.23045	2.49136	0.30103	1.20412	2.12385	1.07918	3.04139	2.92583	n	y
C84	-0.01323	0.07918	1.97772	1.14613	1.95904	1.77085	2.55388	2.38561	-1.35655	1.14613	0.17609	-1.13077	3.82478	0.20412	2.13988	2.36173	0.51851	1.49136	1.54407	1.07918	2.89098	2.86273	n	y
C85	-0.11919	0.38021	1.72428	1.07918	2.14301	1.50515	2.71684	2.75051	-1.40894	1.17609	0.20412	-1.26761	3.77012	0.34242	2.3075	2.44404	0.41497	0.81954	1.76343	0.91908	2.90037	2.82866	n	y
C86	-0.14874	-0.39794	2.02938	0.97772	2.08991	1.50515	2.37658	2.31387	-1.19382	0.81954	0.27875	-1.48149	3.60746	-0.05552	2	2.13672	0.4624	1.5682	1.6902	0.54407	2.75587	2.81823	n	y
C87	-0.26761	-0.24413	1.88081	0.91381	1.87506	1.50515	2.54158	2.26717	-2.11919	0.76343	0.32222	-1.45593	3.56229	-0.02687	1.85126	2.14301	0.39794	1.30103	1.74036	0.54407	2.81358	2.65514	n
C88	-0.1549	0.14613	1.92428	1.14613	1.81954	1.66276	2.52892	2.1959	-1.4318	0.95904	0.23045	-1.3279	3.67761	0.07918	2.04922	2.25285	0.51851	0.86923	1.59106	0.54407	2.77743	2.81558	n	y
C89	-0.13077	-0.13668	2.21484	1.04139	1.96379	1.70757	2.8055	2.51322	-1.4318	0.97772	0.14613	-1.0655	3.68664	0	2.51983	2.58771	0.04139	1.27875	1.89209	0.54407	2.79518	2.82347	n	y
C90	-0.26761	-0.69897	2.39094	0.91381	1.81954	1.76343	2.50243	2.17026	-1.14874	0.99564	0.20412	-1.48149	3.58546	0.11394	2.47712	1.44716	0.27875	1.07918	1.50515	0.54407	2.81624	2.63347	n	y
C91	-0.27572	-0.04576	1.98677	1	2.07918	1.59106	2.56348	2.55023	-1.46852	0.91381	0.36173	-1.37675	3.63548	-0.04576	2.17609	2.27184	0.43136	0.53148	1.74036	1.04139	2.74974	2.99564	n	y
C92	-0.18046	0	1.83251	0.97772	1.87506	1.30103	2.48996	2.36173	-1.45593	1.04139	0.32222	-1.3279	3.52375	0.25527	2.17609	2.37475	0.04139	1.27875	1.83885	0.38021	2.71933	2.68842	n	y
C93	-0.55284	0.75587	1.81291	0.97313	1.81291	1.59106	2.30963	2.20412	-1.33724	1.17609	0.23045	-1.40894	3.34242	-0.10791	2.14613	2.33846	0.14613	0.6902	1.64345	0.54407	2.65801	2.549	n	y
C94	-0.25964	0.41497	1.72428	0.96848	2.07555	1.57978	2.72346	2.77887	-1.46852	1.04139	0.32222	-1.52288	3.51322	0.14613	2.4014	2.52763	0.44716	1.14613	1.70757	1.11394	2.89209	2.86629	n
C95	-0.14874	-0.00436	1.81291	1.04139	1.95424	1.64345	2.5966	2.38739	-1.52288	0.81954	0	-1.52288	3.47422	-0.00877	2.38561	2.22789	0.36173	0.716	1.78533	0.91908	2.76193	2.82607	n
C96	-0.14874	-0.79588	1.88081	0.94448	2.08279	1.66276	2.55751	2.2878	-1.20761	0.99564	0.38021	-1.3279	3.63043	0.34242	2.48144	2.47567	0.64345	1.36173	1.53148	0.77815	2.93247	2.83632	n	y
C97	-0.18046	0.49136	2.18184	0.96848	2.10037	1.70757	2.549	2.22531	-1.40894	1.11394	0.07918	-1.3279	3.74036	0	2.16732	2.29226	0.49136	0.44716	1.59106	1.04139	2.77012	2.74036	n	y
C98	0.04139	-0.42022	1.99564	0.9345	2.02119	1.51851	2.52763	2.39094	-1.4318	1.07918	0.20412	-1.52288	3.51322	0.32222	1.97313	2.08279	0.27875	1.23045	1.82607	0.77815	2.80414	2.9248	n	y
C99	-0.35655	-0.14874	2.06446	1.04139	2.01703	1.63347	2.52634	2.3962	-1.85387	0.86923	0.14613	-1.4437	3.54531	0.04139	2.17609	2.34242	0.32222	1.47712	2.28103	0.6902	2.70415	2.72016	n
C100	-0.25964	0.94448	1.93952	1	2.14922	1.41497	2.53656	2.57864	-1.65758	1.20412	0.20412	-1.55284	3.69108	0.07918	1.98677	2.10037	0.25527	1.34242	1.59106	0.77815	2.89154	2.81823	n	y
C101	-0.11351	-0.82391	2.01703	0.88649	1.85733	1.6902	2.66652	2.52114	-1.37675	0.97772	0.36173	-1.52288	3.64933	0.17609	2.1959	2.40312	0.32222	1.44716	2	0.85733	2.74896	2.80482	n	y
C102	-0.20761	1.59106	1.25527	0.93952	1.96848	1.59106	2.69285	2.3483	-1.4318	0.8451	0.14613	-1.5376	3.56703	0.23045	2.21219	2.34044	0.36173	0.92428	1.5682	0.5682	2.90849	2.91645	n
C103	-0.18709	0.20412	2.0086	1.04139	2.31597	1.63347	2.66181	2.54654	-1.24413	1.04139	-0.09691	-1.17393	3.5563	0.04139	2.72099	2.64444	0.43136	0.51851	1.44716	1.07918	2.85794	2.82607	n	y
C104	-0.02687	0.4624	2.09342	1.04139	1.97313	1.62325	2.6149	2.4183	-1.23657	0.96848	0.38021	-1.30103	3.60853	0.17609	1.94939	2.2878	0.38021	0.77085	1.36173	0.88081	2.85431	2.81558	n	y
C105	-0.29243	-1.17393	2.02938	1.04139	1.95424	1.65321	2.83759	2.35411	-1.69897	1.27875	0	-1.25181	3.85673	0.25527	2.23045	2.4183	0.5563	1.59106	2.10037	0.38021	2.74351	2.93651	n	y
C106	-0.17393	0.57978	1.6721	0.92942	1.91381	1.60206	2.50515	2.24551	-1.58503	0.90309	0.39794	-1.34679	3.53148	0.14613	2.23805	2.40654	0.44716	1.49136	1.70757	0.88081	2.71767	2.76042	n
C107	-0.1549	0.07918	1.99123	1.11394	1.97772	1.61278	2.59106	2.22272	-1.37675	1.23045	0.17609	-1.18709	3.42325	0	2.32838	2.42975	0.5682	1	1.73239	1.11394	2.87679	2.71265	n	y
C108	-0.18709	-0.76955	2.22531	1.30103	2.11059	1.51851	2.58433	2.44091	-2.11351	1.17609	-0.76955	-1.20066	3.72916	0.44716	2.57287	2.65321	0.47712	1.14613	1.73239	0.94939	3.03342	2.8488	n	y
C109	-0.04576	-0.63827	1.88081	0.91381	1.49136	1.53148	2.28556	2.25527	-1.46852	1.11394	0.20412	-1.52288	3.77887	0.38021	1.92942	2.11394	0.32222	0.96379	1.9345	0.5682	2.75815	2.76641	n	y
C110	-0.03621	-0.38722	2.19866	1.14613	2.1038	1.66276	2.66464	2.85854	-1.72125	1.14613	0.32222	-1.63827	3.58771	-0.03152	1.89209	2.11059	0.47712	1.07918	1.61278	0.38021	3.24551	2.76567	n	y
C111	-0.11919	0.76343	1.93952	1.04139	2.04922	1.4624	2.71684	2.46835	-2.09151	1.04139	0.07918	-1.3279	3.63347	0.17609	2.26482	2.43775	0.59106	1.20412	1.38021	1.9345	2.9425	2.90634	n
C112	-0.02687	0.51851	2.03342	1.14613	2.16435	1.54407	2.46835	2.39094	-2.17393	0.96848	0.04139	-1.45593	3.46835	0.25527	2.07188	2.31806	0.44716	0.83251	1.36173	1.17609	3.02119	2.99211	n
C113	0.25527	-0.5376	1.50515	1.23045	2.02531	1.53148	2.62221	2.26245	-1.4318	1.34242	0.36173	-1.3279	3.55267	0.39794	2.01703	2.31175	0.34242	1.25527	1.92428	0.77815	3.02531	3.08991	n	y
C114	-0.284	-0.01773	1.50515	0.87506	1.88649	1.64345	2.51455	2.4014	-1.29243	0.76343	0.04139	-1.4437	3.63347	0.04139	2.19866	2.34044	0.25527	0.80618	1.61278	0.77815	2.74351	2.70586	n
C115	0.14613	0.5563	1.90849	1.25527	2.1959	1.57978	2.81224	2.53656	-1.01323	1.20412	-0.3279	-1.72125	3.67578	0.4624	2.08991	2.06446	0.07918	1.43136	1.34242	1.17609	3.0569	3.07555	n	y
C116	-0.08092	-0.56864	1.79239	1	1.94448	1.59106	2.65128	2.43775	-1.69897	0.716	0.14613	-1.35655	3.58771	0.17609	1.96379	2.19866	0.47712	0.49136	1.41497	1	2.93095	2.60959	n
C117	-0.18046	0.4624	1.74036	1.04139	2.00432	1.59106	2.42975	2.24551	-1.61083	0.81954	0.41497	-1.20761	3.49554	0.11394	2.23805	2.3927	0.50515	1	1.5682	0.69897	2.96237	2.98588	n
C118	-0.03152	0.63347	2.1271	1.04139	1.96848	1.54407	2.6721	2.69108	-2.24413	1.11394	0.30103	-1.22915	3.61909	0.20412	2.08991	2.26007	0.34242	1.11394	1.62325	0.88081	2.98722	2.72263	n
C119	0.07918	0.86332	2.16732	1.14613	2.0569	1.41497	2.77159	2.36736	-2	0.90309	0.25527	-1.22915	3.64147	0.4624	2.53275	2.66839	0.34242	0.85126	1.94939	0.88081	2.96848	2.96237	n	y
C120	-0.20066	0.44716	2.09342	1.04139	1.99564	1.60206	2.65225	2.3075	-1.5376	1.14613	0.14613	-1.38722	3.71181	0.23045	2.18752	2.33445	0.47712	1.27875	1.74819	0.38021	2.95521	2.65418	n	y
C121	-0.20761	-0.06048	1.95904	0.98677	1.97772	1.62325	2.49693	2.3927	-1.61083	1	0.23045	-1.38722	3.47276	0	2.33646	2.5172	0.36173	1.54407	1.98227	0.73239	2.75358	2.74273	n
C122	-0.03621	-0.21467	1.74036	1.23045	1.85733	1.49136	2.85187	2.38739	-1.55284	1.36173	0.27875	-1.25181	3.64542	0.07918	2.23045	2.52244	0.64345	0.70757	1.50515	1.04139	2.90472	2.92583	n
C123	0	-0.4318	1.96848	1.23045	2.02119	1.47712	2.64345	2.50243	-1.82391	1.04139	0.14613	-1.35655	3.53656	0.25527	2.26245	2.36173	0.53148	1.25527	1.64345	1.59106	2.98318	2.85914	n
C124	-0.24413	0.32222	1.62325	1	1.79934	1.75587	2.84323	2.37475	-1.55284	1.14613	-0.16115	-1.5376	3.70501	-0.06048	1.88649	2.14922	0.27875	1	1.5682	0.5682	2.87448	2.68034	n
C125	0.07918	0	1.59106	1.07918	2.07918	1.79934	2.60959	2.45484	-1.36653	1.07918	0.30103	-1.05552	3.78675	0.20412	2.59218	2.67394	0.27875	1.23045	1.69897	1.07918	2.92117	2.91169	n
C126	-0.17393	0.30103	1.94448	1.11394	2.0569	1.76343	2.59439	2.36922	-1.92082	0.96848	0.30103	-1.14267	3.43933	0.14613	2.42813	2.62531	0.34242	0.95424	1.81291	0.64345	2.84073	2.82866	n
C127	-0.11351	-0.17393	1.66276	0.81291	2.01284	1.74819	2.32838	2.44091	-2.17393	0.79934	-0.14874	-1.61979	3.5832	0.11394	1.93952	2.18469	0.17609	1.07918	1.85733	1.23045	2.78176	2.72099	n
C128	-0.14267	0.25527	1.79934	1.14613	2.0607	1.83251	2.63749	2.44404	-1.03152	1.17609	0.34242	-1.37675	3.56229	0.20412	2.2014	2.31597	0.4624	1.14613	1.53148	1.25527	2.82282	2.85673	n	y
C129	-0.22915	-0.48149	1.86332	1	2.07555	1.61278	2.47422	2.35218	-1.61083	0.86332	-0.14874	-1.46852	3.54654	-0.04096	2.14301	2.38739	0.34242	1.39794	1.9345	0.98227	2.8169	2.75435	n
C130	-0.17393	0.39794	1.36173	0.81291	1.94939	1.74819	2.47712	2.29667	-1.61083	0.96848	-0.14874	-1.63827	3.40312	-0.24413	1.79934	2.2014	0.14613	1.23045	1.30103	1.07918	2.74115	2.72099	n
C131	-0.02228	0.23045	1.43136	1.11394	2.24551	1.66276	2.4133	2.48572	-1.50864	0.96848	-0.14874	-1.33724	3.64147	0.30103	2.21484	2.45484	0.44716	1.20412	1.20412	0.98227	2.97405	2.84448	n
C132	-0.11351	0.53148	1.91908	1.04139	1.88081	1.68124	2.3927	2.43933	-1.79588	1.14613	-0.16115	-1.25964	3.48855	0	2.08279	2.31597	0.23045	1.59106	1.5682	0.93952	2.80277	2.83569	n	y
C133	0	-0.31876	1.62325	0.96848	2.13988	1.716	2.49969	2.34044	-1.60206	0.90849	-0.29243	-1.46852	3.76418	0.07918	1.96848	2.16435	0.51851	0.91381	1.64345	0.93952	2.96708	2.71684	n
C134	-0.21467	1.44716	1.60206	1.11394	2.21484	1.65321	2.61595	2.51188	-1.58503	1.11394	0.23045	-1.38722	3.49693	0.11394	2.01284	2.21219	0.49136	0.77815	1.70757	1.17609	2.83885	2.78533	n
C135	-0.16749	0.54407	1.8451	1	1.91381	1.70757	2.3075	2.10721	-1.69897	0.96848	0.04139	-1.72125	3.48714	0.11394	1.79239	2.00432	0.17609	0.91908	1.47712	0.93952	2.83059	2.74115	n	y
C136	-0.17393	0.17609	2.04922	1.17609	1.93952	1.76343	2.55991	2.48855	-2	1.11394	0.07918	-1.14874	3.40993	0.07918	2.35793	2.48572	0.41497	1.07918	1.38021	0.74036	2.74819	2.83885	n
C137	-0.19382	-0.10237	1.96379	1.11394	1.96848	0.65321	2.25042	2.23553	-1.52288	1.11394	-0.0655	-1.30103	3.76268	0.34242	2.23553	2.46982	0.25527	1.27875	1.54407	0.74036	2.93197	2.75282	n	y
C138	-0.08092	-0.19382	2.4624	1.27875	2.11394	1.68124	2.4456	2.37658	-1.82391	1.30103	-0.12494	-1.3279	3.5611	1.27875	2.10721	2.62221	0.44716	1.39794	1.85733	0.81291	2.85065	2.78604	n	y
C139	-0.10237	0.73239	1.69897	0.97772	2.23805	1.65321	2.58546	2.22789	-1.33724	1.20412	-0.0655	-1.33724	3.63849	0.23045	2.21748	2.25527	0.25527	1.30103	1.44716	1.07918	2.9284	2.79309	n
C140	-0.20761	0.4624	1.25527	1.07918	1.85126	1.60206	2.46835	2.3032	-2.03621	0.6721	0.17609	-1.13668	3.64738	0.39794	2.46538	2.70586	0.20412	0.27875	1.4624	0.79239	2.74036	2.71517	n	y
C141	-0.26761	-0.61979	1.77085	0.9345	1.86332	1.61278	2.43775	2.47129	-1.49485	1.20412	0.07918	-1.4437	3.62428	0.17609	2.06446	2.22011	0.27875	1.25527	1.4624	0.5682	2.74819	2.64246	n	y
C142	-0.3098	-0.85387	1.44716	0.89209	2.07188	1.66276	2.53908	2.17026	-1.21467	0.69897	0.14613	-1.48149	3.55023	0.04139	2.1271	2.24055	0.36173	0.63347	1.4624	0.77815	2.74351	2.60531	n
C143	-0.18046	-0.05061	2.01703	0.92942	1.91381	1.64345	2.51851	2.37291	-2	1.11394	0.25527	-1.35655	3.46389	0.11394	2.14301	2.29667	0.41497	1.44716	1.54407	0.38021	2.81358	2.61805	n
C144	-0.25181	-0.10791	1.98677	0.94448	2.10721	1.6902	2.58546	2.46687	-1.85387	1.07918	0.07918	-1.40894	3.61172	0	2.19033	2.40312	0.36173	1.41497	1.4624	0.5682	2.80956	2.66745	n
C145	-0.1549	-0.13077	2.09342	1.11394	1.99564	1.62325	2.54654	2.62531	-1.4318	1.30103	0.20412	-1.25181	3.69548	0.17609	2.13988	2.3483	0.4624	1.20412	1.5563	0.69897	2.92376	2.81558	n	y
C146	-0.14874	0.716	1.36173	1.20412	2.1959	1.64345	2.65992	2.28103	-1.38722	1.27875	0.04139	-1.10237	3.58883	0.25527	2.7356	2.79379	0.27875	1.11394	1.60206	0.5682	2.75205	2.94596	n
C147	-0.20066	-0.284	1.89763	0.89763	2.2014	1.25527	2.37658	2.4456	-1.76955	0.96848	-0.26761	-1.4318	3.57978	0.04139	2.07918	2.27875	0.20412	1.44716	1.88081	0.8451	2.76864	2.77597	n
C148	-0.22185	-0.48149	2.1038	1	1.82607	1.5682	2.4624	2.33846	-1.61083	0.27875	0.14613	-1.38722	3.40483	-0.284	2.18752	2.28103	0.17609	0.61278	1.50515	0.54407	2.94939	2.59988	n
C149	-0.23657	0.04139	2.30103	0.74819	2.07918	1.65321	2.44248	2.33445	-1.61083	1.11394	-0.05061	-1.4318	3.51188	0.04139	2.13988	2.1959	0.17609	1.43136	1.97313	0.75587	2.79029	3.00432	n
C150	-0.06048	-0.49485	1.64345	1.07918	1.96848	1.54407	2.55267	2.20412	-1.55284	1.17609	0.11394	-1.18046	3.54654	0	2.52634	2.71181	0.38021	1.07918	1.6721	1.20412	2.83442	2.76641	n
C151	-0.17393	0.57978	1.94448	1	2.19312	1.70757	2.63749	2.56467	-1.61979	1.04139	-0.12494	-1.48149	3.58546	0.04139	2.15534	2.43775	0.14613	0.90849	1.38021	0.81291	2.91487	2.77232	n
C152	-0.22185	-0.46852	1.74036	1.47712	1.94448	1.74036	2.54407	2.24055	-2.3098	0.79239	-0.12494	-1.25964	3.44248	0.85733	2.25042	2.55388	0.50515	0.61278	1.51851	0.81291	2.77305	2.74586	n	y
C153	-0.25964	-0.07058	1.74036	0.98227	1.88081	1.68124	2.7348	2.31387	-1.39794	0.91381	-0.18046	-1.3098	3.50379	0	2.29226	2.56467	0.36173	1.07918	1.77815	0.14613	2.81158	2.62428	n
C154	-0.14874	-0.4437	1.68124	1.04139	1.85126	1.74036	2.40654	2.24797	-1.4437	1.07918	-0.02687	-1.72125	3.56348	0.27875	1.85126	2.04922	0.23045	1.23045	1.76343	0.14613	2.80277	2.61595	n
C155	-0.30103	0.23045	1.79239	0.91908	1.88649	1.5682	2.54654	2.23045	-1.48149	0.81954	0.11394	-1.34679	3.58659	0.17609	2.14922	2.32634	0.14613	1.34242	1.50515	0.54407	2.82543	2.60959	n	y
C156	-0.13668	0.57978	1.86923	1.17609	2.02119	1.716	2.77743	2.40312	-1.61083	0.96379	0.23045	-1.79588	3.64836	0.23045	2.0086	2.22789	0.38021	1.11394	1.63347	0.94939	2.943	2.86629	n
C157	-0.25964	-0.24413	1.72428	0.89209	2.16137	1.85126	2.47422	2.33445	-1.22915	0.49136	0.04139	-1.33724	3.617	0.11394	2.18469	2.34635	0.34242	0.77085	1.6902	0.75587	2.68215	2.60746	n
C158	-0.24413	0.25527	1.98227	1.11394	1.92942	1.49136	2.54654	2.57054	-2.3098	1.65321	0.11394	-1.3098	3.62221	0.30103	2.14613	2.45332	0.38021	1.34242	1.14613	0.94939	2.77012	2.86451	n	y
C159	-0.09691	0.64345	1.72428	0.96379	1.98227	1.73239	2.44091	2.36922	-1.36653	1	-0.65758	-1.4318	3.61066	0.07918	2.32838	2.5955	0.04139	0.54407	1.49136	0.47712	2.9284	2.84448	n
C160	-0.06048	0.25527	1.88081	1.04139	2.0569	1.5563	2.5092	2.4216	-1.61083	1.04139	0.11394	-1.36653	3.49415	0	2.14613	2.32222	0.17609	1.68124	1.98227	0.8451	2.73159	2.95036	n
C161	-0.12494	0.57978	1.89763	0.83251	2.11727	1.716	2.2878	2.32222	-1.92082	0.86332	0.04139	-1.14267	3.57978	0.17609	2.63448	2.71265	0.44716	1.60206	1.99564	1.17609	2.80003	2.79657	n
C162	-0.25964	-0.09691	1.77815	0.77815	2.08279	1.64345	2.25527	2.16435	-1.48149	0.716	-0.14874	-1.82391	3.67669	0.23045	1.98227	2.19033	0.30103	1.47712	1.04139	0.54407	2.88309	2.72509	n	y
C163	-0.20066	-0.18709	1.97772	1.14613	2.16732	1.75587	2.4456	2.58883	-1.45593	0.93952	-0.16115	-1.5376	3.71349	0.07918	1.70757	1.83885	0.4624	1.17609	1.20412	0.93952	2.79239	2.67578	n	y
C164	0	1.14613	2.44871	1.14613	1.90309	1.60206	2.5977	2.52504	-1.52288	1.90849	0.07918	-1.25964	3.50379	-0.04096	2.43136	2.549	0.34242	1.39794	1.59106	1.07918	2.98182	2.92788	n	y
C165	-0.11919	0.6902	1.62325	1	1.80618	1.76343	2.58771	2.18184	-1.35655	0.83885	0.17609	-1.23657	3.81425	0.17609	2	2.22789	0.4624	1.17609	1.57978	0.17609	2.79379	2.87679	n
C166	-0.16749	-0.52288	1.79934	1.07918	2.63949	1.88081	2.55751	2.57864	-1.45593	1.20412	0.14613	-1.46852	3.5966	0.07918	2.19866	2.11727	0.5563	1.04139	1.76343	1.17609	2.79796	2.64147	n	y
C167	-0.45593	0.04139	1.94448	0.92942	2.00432	1.65321	2.48572	2.18752	-1.284	0.88081	-0.16115	-1.4437	3.78604	0.20412	1.97313	2.07555	0.39794	1.07918	1.61278	0.92428	2.77815	2.70415	n	y
C168	-0.02228	1.23045	1.25527	1.07918	2.09691	1.50515	2.47857	2.51455	-1.85387	1.07918	0	-1.3279	3.24304	0.17609	2.32838	2.55267	0.27875	1.25527	1.79934	0.92428	2.8488	2.98811	n
C169	-0.18709	-0.18046	1.99564	0.96848	2.33244	1.61278	2.44091	2.3075	-1.3279	1.04139	0.20412	-1.10791	3.52375	0.30103	2.55388	2.69897	0.63347	1.17609	1.76343	0.5682	2.88024	2.93247	n	y
C170	-0.14267	-0.50864	2.04922	1.07918	1.97772	1.57978	2.53275	2.22531	-1.46852	0.81954	0.14613	-1.48149	3.66464	0.07918	2.20952	2.34044	0.41497	0.90849	1.86332	1.04139	2.76567	2.76641	n	y
C171	-0.18709	-0.284	1.87506	1.6721	2.1959	1.65321	2.17898	2.67578	-2.09151	0.90309	0.30103	-1.76955	3.52375	0.17609	1.50515	1.76343	0.51851	0.91381	1.6721	0.88081	3.07918	2.78888	n	y
C172	-0.27572	0.47712	1.59106	1	1.87506	1.51851	2.40312	2.43297	-1.69897	0.5682	0.49136	-1.11351	3.36736	0.07918	2.08279	1.81291	0.14613	0.85733	1.49136	0.38021	2.81224	2.62634	n
C173	-0.25181	0.07918	1.49136	1.23045	1.85733	1.74036	2.4843	2.36736	-1.42022	0.85733	-0.4318	-1.18709	3.50651	0.07918	2.49136	2.8014	0.57978	0.83885	1.53148	0.62325	2.89818	2.62428	n
C174	-0.01773	0.50515	1.41497	1.20412	2	1.53148	2.67761	2.74273	-1.61083	0.96848	0.04139	-1.20761	3.76938	0.27875	2.30103	2.48996	0.43136	0.5682	1.68124	0.69897	2.99695	2.76042	n
C175	-0.13668	-0.01773	1.89209	2.11727	1.98227	1.38021	2.57749	2.35025	-1.69897	1.14613	0.04139	-1.20066	3.5172	0.14613	2.33445	2.53908	0.41497	1.30103	1.6721	0.69897	2.81889	2.74819	n	y
C176	-0.24413	-0.52288	1.49136	1	1.94448	1.75587	2.27875	2.11727	-2.11351	0.91381	-0.18046	-1.88606	3.4624	-0.09691	1.72428	2.04139	0.30103	0.75587	1.44716	0.81291	2.74896	2.68842	n
C177	-0.22915	0.04139	0.97772	1.07918	2.0569	1.70757	2.63849	2.71433	-1.82391	0.96379	-0.02687	-1.25181	3.63347	0.23045	2.29226	2.56703	0.49136	0.6721	1.76343	0.81291	2.82086	2.65801	n
C178	-0.02228	-0.17393	2.17026	1.11394	1.86332	1.6902	2.60853	2.31387	-1.4437	1.11394	-0.02687	-1.04576	3.80482	0.11394	2.69897	2.79727	0.34242	0.49136	1.68124	0.81291	2.81425	2.74273	n	y
C179	-0.20066	0	1.82607	0.91908	2.03342	1.716	2.45788	2.51055	-1.76955	0.49136	0.20412	-1.49485	3.48855	-0.04576	2.13672	2.33244	0.07918	1.17609	1.5682	0.91908	2.90956	2.79657	n
C180	-0.284	-0.4437	2.01284	0.81291	2.15836	1.82607	2.55871	2.57054	-1.27572	0.91908	0.11394	-1.33724	3.69461	0.34242	2.36549	2.43297	0.30103	0.5563	1.65321	1.17609	2.91487	2.70672	n	y
C181	-0.14874	-0.02687	1.92942	0.82607	2.07188	1.63347	2.29885	2.66181	-1.40894	0.86332	-0.05061	-1.33724	3.66464	0.04139	2.04532	2.36922	-0.10791	0.716	1.4624	0.98227	2.68305	2.72099	n	y
C182	-0.11351	0.14613	1.95904	1.04139	2.0569	1.57978	2.60314	2.4216	-1.61083	0.91908	0.11394	-1.20761	3.48144	-0.22915	2.38739	2.65992	0.38021	0.6902	1.54407	0.54407	2.82151	2.72509	n
C183	-0.20761	0.68124	1.32222	0.99564	1.95904	1.78533	2.53782	2.70501	-1.82391	0.91381	-0.12494	-1.3098	3.52892	0.07918	2.36922	2.50651	0.38021	0.8451	1.50515	0.62325	2.86034	2.7364	n
C184	-0.26761	-0.16115	1.94448	0.89763	2.00432	1.69897	2.23805	2.74663	-2.17393	1	-0.05061	-1.39794	3.35603	-0.38722	2.14301	2.42651	0.47712	1.04139	1.51851	0.98227	2.83569	2.69197	n
C185	-0.10237	0.77815	1.43136	0.83251	2.0086	1.65321	2.53148	2.38021	-1.60206	1.23045	0.34242	-1.284	3.62737	0.07918	2.45637	2.44871	0.36173	1.47712	1.34242	0.93952	2.81823	2.85126	n
C186	-0.0655	0.27875	1.69897	1.07918	2.09342	1.63347	2.38202	2.3962	-1.79588	0.90849	0.07918	-1.48149	3.60206	0.11394	1.74036	1.97313	0.30103	1.4624	1.88081	0.74036	2.77379	2.89042	n
C187	0.07918	0.59106	1.74819	1.20412	2.08636	1.68124	2.68664	2.45332	-1.60206	1.20412	0.30103	-1.33724	3.77379	0.07918	2.20412	2.26951	0.4624	1.78533	2.13988	1.07918	2.93349	2.86864	n
C188	-0.23657	1.39794	2.45788	1	2.02938	1.57978	2.39445	2.38021	-1.30103	1.38021	0.32222	-1.18046	3.86747	0.36173	2.33846	2.5172	0.53148	1.90309	2.11394	0.79239	2.93349	3.07555	n	y
C189	0.04139	-0.11919	2.17026	1.86332	1.89763	1.51851	2.66932	2.26245	-1.61083	1	-0.12494	-1.284	3.39094	0.41497	2.15836	2.42651	0.07918	1.11394	1.54407	0.81291	2.78958	2.89927	n	y
C190	-0.29243	-0.1549	2.0086	1.17609	2.10721	1.6721	2.64933	2.33041	-1.31876	0.83251	0.11394	-1.52288	3.63246	0.27875	1.96848	2.25042	0.20412	0.76343	1.41497	1.11394	2.87216	2.8202	n	y
C191	-0.0655	0.43136	1.60206	1.07918	2.01703	1.63347	2.62014	2.61278	-2.03621	1.07918	0.14613	-1.284	3.50379	0.04139	2.13988	2.233	0.34242	0.8451	1.43136	0.97313	2.85673	2.96332	n
C192	-0.11351	-0.23657	2.08991	0.97772	1.95904	1.65321	2.39094	2.34635	-1.31876	1.07918	-0.0655	-1.284	3.74663	0.14613	2.36361	2.37291	0.30103	1.44716	1.66276	0.93952	2.80686	2.74115	n	y
C193	-0.16115	-0.20066	1.8451	1.07918	1.92942	1.72428	2.43136	2.4624	-1.79588	0.87506	-0.16115	-1.33724	3.76042	-0.04096	1.75587	2.19033	0.4624	0.87506	1.65321	0.74036	2.93298	2.7796	n
C194	-0.16115	-0.11919	1.81291	1.07918	1.99123	1.60206	2.60314	2.74974	-1.61083	0.79239	-0.25181	-1.38722	3.61909	0.14613	2.32222	2.44404	0.32222	0.90309	1.81954	1.14613	2.80618	2.73957	n
C195	-0.16115	-0.52288	2.08279	0.99564	2.07188	1.57978	2.48001	2.32634	-1.82391	0.62325	-0.12494	-1.40894	3.66181	0.14613	2.15534	2.3784	0.27875	0.716	1.57978	0.94939	2.82086	2.77815	n
C196	-0.22915	-0.09691	1.68124	0.85126	1.90309	1.62325	2.1959	2.33846	-1.49485	0.716	-0.25181	-1.4437	3.57287	0	2.07555	2.36361	0.44716	1.04139	1.49136	0.94939	2.8014	2.5977	n
C197	-0.25181	0.04139	2.17026	1.04139	2.21484	1.44716	2.64345	2.3075	-1.85387	1.27875	0.38021	-1.48149	3.56937	0.07918	2.20952	2.35793	0.36173	1.6721	1.62325	0.54407	3.0607	2.9248	n	y
C198	-0.10237	-0.02228	2.49554	1.07918	2.0086	1.50515	2.61172	2.48001	-1.95861	1.17609	0	-1.27572	3.79099	0.07918	2.26482	2.47129	0.36173	0.4624	1.79934	0.77815	2.87216	2.92065	n	y
C199	0.04139	0.04139	1.79239	1.04139	1.99123	1.6721	2.69197	2.79169	-1.61979	1.04139	0.07918	-1.60206	3.64345	0.11394	1.61278	1.76343	0.41497	0.82607	1.49136	0.54407	2.82217	2.6464	n	y
C200	-0.07572	-0.4437	2.20412	1.04139	2.06819	1.5563	2.71265	2.41664	-1.56864	0.79239	0.07918	-1.36653	3.68395	0.04139	2.21219	2.36922	0.39794	1	1.6721	0.5682	2.88593	2.90849	n
C201	-0.20066	-0.11351	2.02938	0.98677	1.97313	1.49136	2.55388	2.22531	-1.40894	0.99564	0.07918	-1.40894	3.44871	0.20412	2.06819	2.29667	0.32222	0.65321	1.51851	0.91908	2.80072	2.75664	n	y
C202	0.04139	0.20412	2.02938	1.11394	1.98227	1.38021	2.68664	2.37658	-1.52288	1.25527	-0.23657	-1.40894	3.60423	0.11394	2.22531	2.24055	0.38021	0.88081	2.08279	0.91908	2.8893	3	n	y
C203	0	-0.10237	2.18752	1.04139	2.16435	1.53148	2.72916	2.64147	-1.61979	0.99564	0.07918	-1.27572	3.83885	0.07918	2.38382	2.54407	0.17609	0.85733	1.65321	0.91908	2.82737	2.91062	n
C204	-0.20066	0.14613	1.50515	1.11394	2.1271	1.62325	2.5563	2.42651	-1.4318	0.93952	0	-1.45593	3.55509	0.32222	2.01703	2.2833	0.49136	0.9345	1.53148	0.6902	2.91645	2.81291	n
C205	-0.08092	-0.76955	1.66276	0.95424	2.0569	1.53148	2.48855	2.26717	-1.61979	0.91381	-0.23657	-1.72125	3.63949	-0.05552	2.10037	2.12385	0.20412	0.70757	1.39794	1.49136	2.75587	2.81823	n
C206	-0.04576	0.87506	1.83251	1.07918	1.98677	1.25527	2.64738	2.49415	-2	0.96848	-0.08092	-1.22915	3.50515	0.25527	2.35793	2.41996	0.30103	1.11394	1.74819	0.69897	2.92117	2.88593	n
C207	-0.3098	-0.10791	1.96848	1.64345	1.94939	1.5563	2.37658	2.31387	-1.69897	0.5682	0.5682	-1.13077	3.39967	-0.24413	2.11394	1.72428	0.25527	0.32222	1.23045	1.57978	2.81491	2.81023	n	y
C208	-0.17393	0.82607	1.59106	0.95904	1.89763	1.51851	2.47129	2.20683	-1.37675	0.5682	-0.08092	-1.63827	3.24551	-0.02228	1.61278	1.85733	0.30103	0.72428	1.17609	0.69897	2.68931	2.72916	n
C209	-0.13077	-0.69897	1.80618	1.07918	2.07188	1.66276	2.65225	2.3032	-1.60206	0.87506	0.49136	-1.01323	3.43297	0.34242	2.13354	2.2833	0.39794	0.85733	1.85126	1.14613	2.9722	2.67486	n	y
C210	-0.22185	-0.55284	1.92942	0.93952	1.91908	1.62325	2.62428	2.07555	-1.4437	0.98677	0.04139	-1.52288	3.58659	0.11394	1.91381	2.10037	0.07918	1.11394	1.34242	0.62325	2.7185	2.7332	n	y
C211	0.27875	0.17609	1.47712	1.25527	2.0569	1.60206	2.83948	2.54283	-1.38722	1.11394	0	-1	3.66464	0.27875	1.83885	2.62428	0.66276	-0.19382	1.60206	1.11394	3.27416	3.11727	n
C212	-0.09691	0.51851	2.35218	1.07918	2.03743	1.70757	2.65706	2.45939	-1.82391	1.41497	-0.26761	-1.29243	3.56585	0.11394	2.50786	2.65031	0.14613	1.14613	1.79239	0.8451	2.91328	3.02938	n	y
C213	0.04139	-0.00877	1.77815	1.07918	1.88649	1.66276	2.18184	2.31597	-1.69897	1.11394	0.54407	-1.58503	3.66745	0.07918	1.79239	1.99564	0.43136	1.79239	2.16732	0.93952	2.85491	2.80003	n	y
C214	0.04139	0.53148	1.74819	1.11394	2.06446	1.6721	2.41996	2.54407	-1.69897	1.14613	0	-1.23657	3.75435	0.14613	2.20952	2.37475	0.36173	1.14613	1.79239	1.07918	2.94052	2.98363	n
C215	0.07918	1.54407	2.14301	1.27875	1.99564	1.51851	2.89542	2.41664	-1.92082	1.27875	0.4624	-1	3.56229	0.57978	2.68034	2.7348	0.30103	1.49136	2.02938	1.30103	2.97405	3.13988	n	y
C216	0.11394	-0.24413	2.11059	1.14613	1.88081	1.6721	2.63649	2.57287	-1.60206	1	0.38021	-0.95861	3.78176	0.20412	2.84136	2.63849	0.39794	1.59106	1.74819	0.74036	2.95085	2.88762	n
C217	-0.10791	1	2.29447	1	2.51587	1.30103	2.60531	2.60097	-1.74473	1.39794	0.17609	-1.25181	3.49969	0.07918	2.38917	2.4843	0.30103	1.38021	1.716	1.23045	2.87332	2.91803	n	y
C218	0.17609	0.25527	2.19033	1.32222	1.91381	0.90309	2.72997	2.94349	-0.95861	1.14613	0.11394	-1.12494	3.93952	0.36173	2.08991	2.39445	0.23045	1.60206	1.53148	1.36173	2.90634	3.15836	n	y
C219	0.04139	1.23045	2.12385	1.23045	1.92428	1.57978	2.45939	2.47422	-1.79588	1.30103	0.23045	-1.30103	3.51851	0.20412	1.90309	2.24055	0.43136	1.32222	1.86332	1.14613	2.97681	3.07918	n	y
C220	0.04139	0.53148	1.89763	1.07918	2.0086	0.90309	2.43933	2.36361	-1.79588	1.20412	0.34242	-1.23657	3.74507	0.30103	2.23045	2.42813	0.38021	1.30103	1.716	0.74036	2.94349	2.70757	n	y
C221	-0.03621	0.20412	1.66276	0.96848	2.10721	1.68124	2.48001	2.39094	-1.45593	0.86332	0.30103	-1.49485	3.63548	0.38021	1.93952	2.19866	0.34242	1.34242	1.88649	0.8451	2.74115	2.76418	n	y
C222	-0.19382	0.62325	1.77815	0.94939	1.90309	1.78533	2.5611	2.34635	-1.40894	0.96848	-0.05061	-1.63827	3.40312	-0.08619	1.88649	2.17026	0.14613	0.61278	1.25527	1.07918	2.82866	2.76118	n	y
C223	-0.06048	-0.01773	1.98677	1.17609	2.50106	1.65321	2.88649	2.91116	-1.29243	1.63347	0.11394	-1.33724	3.29885	0.23045	2.4609	2.48572	0.5563	0.79239	1.60206	1.89763	3.06819	2.82086	n	y
C224	0.17609	0.60206	1.62325	1.07918	2.09691	1.6721	2.59329	2.62428	-1.61083	1	0	-1.19382	3.57287	0.14613	2.22531	2.43775	0.39794	1.04139	1.50515	1.07918	2.96095	2.87679	n
C225	-0.25964	-0.17393	1.8451	1	1.97313	1.59106	2.53403	2.41664	-1.3279	1.07918	0.07918	-1.76955	3.65321	0.30103	1.51851	1.83885	0.53148	0.95424	1.30103	0.54407	2.89927	2.63347	n	y
C226	-0.07058	0.07918	2.14301	0.89763	2.04922	0.90309	2.55145	2.57519	-1.95861	1.07918	0.07918	-1.40894	3.52892	0.14613	2.38561	2.42975	0.36173	1.61278	1.95904	1.14613	2.66087	2.76641	n
C227	-0.09151	-0.01323	1.66276	0.83251	2.02938	1.72428	2.44716	2.68664	-1.52288	1.27875	0.17609	-1.4437	3.48714	0.23045	2.02531	2.17609	0.23045	1.32222	1.81291	0.91908	2.74194	2.71265	n
C228	-0.16749	0.11394	1.72428	0.9345	1.11394	1.5563	2.57054	2.66745	-1.52288	0.99564	-0.23657	-1.5376	3.63949	0.20412	2.06446	2.1959	0.07918	1.38021	1.78533	0.54407	2.88366	2.77232	n
C229	-0.1549	-0.25964	2.11059	1.07918	2.03743	0.80618	2.38739	2.52504	-1.61083	1.23045	0.11394	-1.5376	3.55388	-0.01773	1.78533	2.02119	0.47712	-0.33724	1.51851	0.69897	3.08279	2.85914	n	y
C230	0	-0.20066	1.59106	1	1.98227	1.39794	2.37107	2.47712	-1.37675	1.07918	0.34242	-1.42022	3.51587	0.11394	2.29885	2.37475	0.11394	1.74819	2.36736	0.88081	3.0569	2.70243	n
C231	-0.02228	-0.42022	2.09342	0.89209	2.0086	1.64345	2.52504	2.4609	-1.69897	1.30103	0.30103	-0.95861	3.50515	0.04139	2.58771	2.46538	0.49136	1.9345	2.11727	0.88081	2.80209	2.70243	n	y
C232	-0.284	-0.52288	1.83251	0.96379	1.93952	1.39794	2.37475	2.14613	-1.61083	1.41497	0.14613	-1.5376	3.50106	-0.09691	1.69897	2.04922	0.25527	0.17609	1.38021	1	2.75967	2.58659	n	y
C233	0	0.14613	2.03743	1.07918	2.08991	1.54407	2.61595	2.50243	-1.82391	0.27875	-0.13077	-1.42022	3.62118	-0.01323	1.92428	2.19866	0.4624	1.30103	1.94448	0.69897	2.89927	2.79934	n
C234	-0.3098	0	2.25768	0.91908	1.94448	1.5563	2.47712	2.33846	-2	1.23045	-0.04096	-1.48149	3.45788	-0.08619	2.06819	2.26007	0.34242	1.50515	1.49136	0.69897	2.8791	2.92993	n	y
C235	-0.17393	-0.4318	2.03342	0.87506	1.96379	1.41497	3.26245	2.36922	-1.61083	1.07918	0.04139	-1.19382	3.42488	0.07918	2.45025	2.734	0.20412	1.11394	2.38561	0.54407	2.73957	2.76118	n
C236	-0.02687	0.30103	2.04532	1.32222	1.94448	1.41497	2.83822	2.58433	-1.61083	1.14613	2.0086	0.47712	3.47422	2.0086	2.36736	2.33244	0.44716	1.36173	1.70757	0.81291	2.99695	2.83251	n	y
C237	-0.11351	0.96379	1.41497	1.17609	1.79239	1.85126	2.62428	2.47567	-1.11351	0.91381	0.32222	-1.24413	3.49554	0.14613	2.25042	2.46835	0.25527	0.66276	1.43136	0.94939	2.83569	2.77232	n
C238	-0.04096	-0.06048	2.10721	1.23045	1.86923	1.69897	2.52244	2.05308	-2	0.716	-0.02687	-1.35655	3.54777	0.23045	2.17609	2.47276	0.34242	0.47712	1.61278	1.04139	2.85248	2.90902	n
C239	-0.22185	0.14613	1.78533	1.11394	1.95424	1.5682	2.51188	2.38202	-1.82391	0.96379	-0.12494	-1.65758	3.51455	0.11394	1.88649	2.21748	0.20412	1.11394	1.69897	1.04139	2.81491	2.72346	n
C240	0.07918	0.17609	1.86923	1.20412	1.96379	1.5563	2.72754	2.32634	-1.82391	1	-0.12494	-1.34679	3.58883	0.17609	2.19866	2.50651	0.25527	1.04139	1.86332	0.81291	2.84386	2.85552	n
C241	-0.22915	-0.10791	1.49136	1.07918	2.01284	1.61278	2.58206	2.54407	-1.72125	0.88649	-0.12494	-1.284	3.52504	0	2.36549	2.69897	0.14613	-0.07058	1.61278	0.94939	2.9058	2.63347	n
C242	-0.05552	-0.24413	1.69897	1	2.00432	1.77085	2.44091	2.29226	-1.52288	0.83885	-0.0655	-1.40894	3.45637	0.32222	2.08991	2.29447	0.27875	0.47712	1.54407	0.74036	2.76716	2.64147	n
C243	-0.24413	0.61278	1.68124	0.96379	1.93952	1.5563	2.48572	2.09691	-1.61083	0.716	-0.02687	-1.60206	3.45939	0.04139	1.91381	2.25285	0.34242	0.68124	1.32222	0.62325	2.69723	2.66558	n
C244	-0.24413	-0.74473	1.8451	0.82607	1.5563	1.6902	2.15836	2.1959	-1.40894	0.79934	0.25527	-1.61979	3.56348	0.14613	2.21748	2.40654	0.23045	0.89209	1.81291	0.54407	2.79865	2.63949	n	y
C245	-0.21467	-0.25964	1.77815	0.88649	2.06446	1.74036	2.58092	2.44091	-1.76955	1.04139	-0.05061	-1.37675	3.51188	0.17609	2.35603	2.50243	0.14613	0.75587	1.77815	0.54407	2.90526	2.75128	n
C246	-0.21467	-0.36653	2.2014	0.96848	1.96379	1.77815	2.5302	2.56348	-1.92082	1.14613	-0.14874	-1.46852	3.40312	0.07918	2.10037	2.00432	0.38021	0.81291	1.68124	0.47712	2.73159	2.83696	n	y
C247	-0.05552	-0.31876	1.66276	0.95904	1.91908	1.64345	2.35984	2.21219	-1.76955	0.716	0.04139	-1.61979	3.64246	0.04139	1.81954	2.20412	0.17609	0.86332	1.27875	0.64345	2.80889	2.68485	n
C248	-0.24413	-0.18709	1.72428	0.89209	2.233	1.61278	2.55871	2.51851	-1.76955	0.86332	0.27875	-1.31876	3.55751	0.07918	2.29003	2.54777	0.36173	0.47712	1.41497	1.07918	2.98091	2.73159	n
C249	-0.01773	-0.09151	1.66276	1.04139	2.15229	1.57978	2.53782	2.22789	-1.92082	0.91908	-0.05061	-1.36653	3.74351	0	2.07918	2.37107	0.25527	0.30103	1.38021	0.64345	2.84942	2.81823	n
C250	-0.11919	-0.33724	1.74819	1.14613	1.92428	1.70757	3.08636	2.57864	-2.3279	1.23045	-0.02687	-0.92082	3.49554	-0.00877	2.734	2.81291	0.27875	1.14613	2.17898	0.93952	2.84819	2.76118	n
C251	-0.02687	0.54407	1.90849	1.63347	1.96379	1.47712	2.50243	2.71349	-2.37675	1.04139	1.07918	-0.46852	3.45332	0.27875	1.81291	1.85126	0.49136	1.17609	2.13988	1.04139	2.76864	2.86688	n	y
C252	-0.25964	0.20412	1.72428	0.92428	1.94448	1.6902	3.07918	2.48001	-1.14267	1.43136	0	-1.4318	3.62634	0.14613	2.18184	2.23553	0.38021	1.27875	2.29885	1.04139	2.83059	2.82347	n
Train
	CD 40 antigen (CD40) (ng/mL)	C-Reactive Protein (CRP) (ug/mL)	Eotaxin-1 (pg/mL)	FASLG Receptor (FAS) (ng/mL)	Intercellular Adhesion Molecule 1 (ICAM- (ng/mL)	Interleukin-13 (IL-13) (pg/mL)	Interleukin-16 (IL-16) (pg/mL)	Interleukin-18 (IL-18) (pg/mL)	Interleukin-3 (IL-3) (ng/mL)	Interleukin-8 (IL-8) (pg/mL)	Matrix Metalloproteinase-1 (MMP-1) (ng/ml)	Matrix Metalloproteinase-10 (MMP-10) (ng/ml)	Matrix Metalloproteinase-2 (MMP-2) (ng/mL)	Matrix Metalloproteinase-7 (MMP-7) (ng/ml)	Matrix Metalloproteinase-9 (MMP-9) (ng/mL)	Matrix Metalloproteinase-9- total (MMP-9 (ng/ml)	Neuronal Cell Adhesion Molecule (Nr-CAM) (ng/mL)	T-Cell-Specific Protein RANTES (RANTES) (ng/mL)	Superoxide Dismutase 1- Soluble (SOD-1) (ng/mL)	Tumor Necrosis Factor alpha (TNF-alpha) (pg/mL)	Vascular Cell Adhesion Molecule-1 (VCAM- (ng/mL)	Vascular Endothelial Growth Factor (VEGF (pg/mL)	FALL
C1	-0.18709	0.25527	1.77085	0.89209	1.90849	1.81954	2.61595	2.42651	-1.02687	1.04139	0.14613	-1.65758	3.72346	0.25527	1.88649	1.94939	0.44716	1.04139	1.63347	1.17609	2.78319	2.75967	y
C2	0.04139	0.38021	2.14301	1.07918	2.22011	1.79239	2.69285	2.84448	-0.92082	1.25527	0.4624	-1.52288	3.52892	0.6721	2.17319	2.16732	0.5682	1.59106	2.14922	0.77815	3.05308	2.94448	y
C3	-0.11351	-0.12494	1.98677	1.04139	2.06446	1.59106	2.51851	2.5611	-1.76955	1.04139	0.14613	-1.39794	3.61278	-0.14874	1.91908	2.08636	-0.12494	0.41497	1.4624	0.38021	2.73799	2.90634	y
C4	-0.13077	-0.76955	2.10037	1.04139	2.23045	0.82607	2.42975	2.42651	-1.45593	0.86923	0	-1.40894	3.77525	0.04139	2.15836	2.34635	0.44716	1.04139	1.66276	0.6902	2.85914	2.84448	y
C5	-0.22915	0.23045	1.98677	0.97313	2.0569	1.77085	2.48001	2.46687	-1.29243	1.14613	0.11394	-1.46852	3.35603	0.17609	2.1271	2.25042	0.5682	1.07918	1.74036	1.11394	2.80414	2.65418	y
C6	-0.09151	-0.85387	1.95904	1.14613	1.90309	1.5563	2.53529	2.31387	-2	0.96379	-0.02687	-1.40894	3.6561	0.20412	2.07918	2.34635	0.30103	0.60206	1.53148	0.62325	2.83885	2.7332	y
C7	-0.13668	-0.52288	1.83251	0.99564	1.80618	1.43136	2.52114	2.13354	-2	1.20412	-0.07058	-1.55284	3.57864	0.14613	1.89209	2.27646	0.43136	1.65321	2.0086	0.81291	2.69108	2.81491	y
C8	-0.18709	0.6902	1.90849	0.94939	1.94448	1.41497	2.52114	2.14613	-1.69897	0.77815	-0.04096	-1.58503	3.59879	0.23045	1.73239	2.06819	0.39794	1.27875	1.69897	0.69897	2.8014	2.67394	y
C9	-0.03152	0.17609	1.90849	1.07918	2	1.50515	2.67943	2.51851	-2	1.34242	0.20412	-1.31876	3.64147	0.25527	2.28103	2.43616	0.54407	1.27875	1.91908	0.38021	2.9425	2.76567	y
C10	-0.25181	0.38021	2.10037	1.14613	1.94939	1.6902	2.65128	2.52892	-1.55284	1.14613	-0.02687	-1.3279	3.5955	0.04139	2.32222	2.63849	0.25527	0.92942	1.60206	0.14613	2.78032	2.75435	y
C11	-0.11919	-0.284	1.86923	1	1.93952	1.23045	2.35218	2.27646	-2.3098	1.11394	0.04139	-1.52288	3.77085	0.36173	2.04532	2.32838	0.32222	1.17609	1.8451	0.62325	2.79796	2.79169	y
C12	-0.22915	-0.18046	1.88081	0.88649	1.95424	1.66276	2.4624	2.38561	-1.50864	0.86332	1.30103	-1.33724	3.60314	1.20412	2.4456	2.67761	0.32222	0.73239	1.66276	0.8451	2.79379	2.66932	y
C13	0.11394	0.8451	1.72428	1.07918	1.88081	1.73239	2.57519	2.3962	-1.52288	0.96848	0.20412	-1.14874	3.65128	0.47712	2.17026	2.28556	0.38021	0.94939	1.77085	1	2.86982	2.80686	y
C14	-0.02228	-0.82391	1.97772	0.96848	2.08279	1.44716	2.45179	2.29226	-1.35655	1.07918	0.11394	-1.11351	3.88366	0.17609	2.42975	2.549	0.5563	1.39794	1.93952	0.85126	3.02531	2.81358	y
C15	0.23045	0.14613	2.21484	1.04139	2.04922	1.6721	2.60097	2.66464	-1.85387	1.11394	0.30103	-1.30103	3.51587	0.25527	2.41497	2.49969	0.39794	1.74819	2.2833	1.04139	2.86629	2.94052	n
C16	-0.11351	-0.17393	1.88081	0.96848	2.09342	1.53148	2.57519	2.35411	-1.65758	0.99564	0.17609	-1.3279	3.74194	0.32222	2.0569	2.25768	0.20412	1.44716	1.88649	0.5682	2.86747	2.83632	n
C17	-0.05552	0.32222	0.97772	1.11394	2.11059	1.60206	2.70329	2.45025	-1.69897	1.04139	0	-1.72125	3.57864	0.11394	1.82607	2.0607	0.41497	1.23045	1.57978	0.91908	2.94743	2.90849	n
C18	0.07918	-0.00436	1.59106	1	1.98677	1.5682	2.46835	2.45179	-1.4318	0.96848	0.36173	-1.40894	3.67302	0.14613	2.26482	2.44248	0.50515	1.4624	1.98677	0.88081	3.0086	2.76042	n
C19	-0.27572	-0.37675	1.79239	0.86923	1.95904	1.5563	2.29885	2.23045	-1.69897	0.96848	0.14613	-1.3279	3.62014	0.07918	2.10721	2.33646	0.34242	1.36173	1.44716	0.69897	2.67761	2.54283	n
C20	-0.12494	-0.35655	1.98227	1.11394	1.95424	1.64345	2.67943	2.36173	-2.3098	1.04139	0.11394	-1.60206	3.62634	0.27875	2.21748	2.43933	0.53148	0.57978	2	0.62325	2.91698	2.7364	n
C21	-0.17393	-0.37675	2.02938	1.11394	1.88081	1.716	2.26482	2.20412	-1.55284	1	-0.12494	-1.60206	3.43933	0	1.85126	2.23805	0.20412	1.11394	1.85733	0.14613	2.80003	2.69897	n
C22	0	0.17609	2.08279	1.20412	2.24304	1.57978	2.68395	2.49136	-1.65758	0.96379	0.04139	-1.48149	3.62221	0.25527	2.06819	2.35025	0.30103	0.83251	1.61278	1	2.89376	2.8791	n
C23	-0.11351	-0.3098	0.97772	1.07918	2.01703	0.90309	2.53782	2.41664	-1.55284	0.79239	-0.02687	-1.3098	3.65031	0.30103	2.08279	2.38739	0.27875	0.73239	1.41497	0.94939	2.90687	2.71684	n
C24	0	-0.02687	2.32838	1.11394	2.12385	1.50515	2.64444	2.51851	-1.92082	1.07918	0.04139	-1.16115	3.65801	0.11394	2.21748	2.42813	0.20412	0.96848	1.75587	1.36173	2.85974	2.86806	n
C25	0.11394	1	1.69897	0.92428	2.26007	1.77085	2.5563	2.76938	-1.58503	1.20412	-0.14874	-1.52288	3.61909	-0.0655	2.33646	2.47276	0.20412	1.62325	2.13033	0.8451	2.94743	2.77305	n
C26	-0.16115	0.44716	1.74819	1.11394	1.99123	1.51851	2.57864	2.74741	-2	1	0.20412	-1.03621	3.58883	0.20412	2.52114	2.65801	0.51851	1.17609	1.82607	0.17609	2.94498	2.73719	n
C27	-0.33724	0	1.95904	1.04139	2.1038	1.57978	2.5172	2.35793	-2.17393	0.716	0.04139	-1.46852	3.68664	0.04139	1.94448	2.30103	0.49136	0.47712	1.36173	0.98227	2.88705	2.69197	n
C28	-0.09691	-0.82391	1.75587	1.07918	2.02119	1.64345	2.29003	2.32428	-1.38722	1.11394	0.23045	-1.52288	3.55991	0.17609	1.80618	2.13033	0.32222	1.14613	1.77085	0.60206	2.82543	2.7332	n

## Sheet: Volumes_Pred
Fall+
	VISCODE	DX_bl	AGE	PTGENDER	PTEDUCAT	PTETHCAT	PTRACCAT	PTMARRY	APOE4	CDRSB	ADAS11	ADAS13	ADASQ4	MMSE	RAVLT_immediate	RAVLT_learning	RAVLT_forgetting	RAVLT_perc_forgetting	LDELTOTAL	DIGITSCOR	TRABSCOR	FAQ	Ventricles			Hippocampus	WholeBrain	Entorhinal	Fusiform	MidTemp	ICV	ABETA_bl	TAU_bl	PTAU_bl	FDG_bl
C1	bl	LMCI	67.5	Male	10	Hisp/Latino	White	Married	0	1	14.33	21.33	6	27	37	7	4	36.3636	4	25	271	0	39605	3.42906	2.35823	6869	1154980	3983	19036	19615	1679440	1501	153.1	13.29
C2	bl	LMCI	70.9	Female	14	Not Hisp/Latino	White	Married	2	1.5	18.33	28.33	10	25	22	-1	4	100	2	56	145	4	38374	3.97745	2.5357		964788				1513350	414.6	221.3	18.07
C3	bl	LMCI	85.8	Female	16	Not Hisp/Latino	White	Married	0	2	17	28	10	26	26	2	7	100	1	43	90	4	30988	3.67269	2.3281		843741				1331040
C4	bl	LMCI	85.9	Male	18	Not Hisp/Latino	White	Never married	1	1	15.33	23.33	7	29	24	1	5	100	1	40	178	1	72746	7.55521	4.53034	5268	962859	3105	16734	16953	1605750	383.3	526	58.65
C5	bl	LMCI	66.5	Male	18	Not Hisp/Latino	White	Married	1	1	9.67	17.67	7	27	29	1	4	57.1429	7	50	94	2	28970	2.63694	1.79046	6232	1098620	3325	20512	20307	1618020	352.5	285.1	28.4	1.36619
C6	bl	LMCI	70	Male	20	Not Hisp/Latino	White	Married	1	1	14	19	5	27	32	4	3	42.8571	1	36	61	2	27972	2.77687	1.68754	7092	1007320	3279	18013	22145	1657560
C7	bl	LMCI	79.7	Male	18	Not Hisp/Latino	Asian	Married	0	0.5	19	27	7	28	18	3	5	100	1	35	157	3	44428	5.30128	3.15683	4764	838061	2082	14919	13444	1407360	792.7	664.6	65.4
C8	bl	LMCI	84.4	Female	16	Not Hisp/Latino	White	Divorced	1	2	10.67	17.67	6	26	25	4	5	55.5556	7	38	167	4	42016	5.49046	3.1693	4705	765255	2718	10467	13550	1325720
C9	bl	LMCI	78.2	Male	18	Not Hisp/Latino	White	Married	1	2	13	21	8	27	19	1	4	100	3	36	96	11	29769	2.98525	1.91882	6901	997202	3894	17173	19212	1551420
C10	bl	LMCI	75.8	Female	16	Not Hisp/Latino	White	Married	1	2.5	12.67	25.67	10	24	23	2	5	100	1	31	300	11	43605	4.60636	2.73638	5572	946626	2985	14245	17784	1593530	580.2	374.6	38.64
C11	bl	LMCI	82.3	Female	18	Not Hisp/Latino	White	Widowed	0	1	7.67		4	29	33	6	3	33.3333	8	39	113	1	26302	2.73466	1.7673		961803				1488260	934.9	205.8	19.47	1.5439
C12	bl	LMCI	86.3	Male	15	Not Hisp/Latino	White	Married	0	1	5	8	2	27	45	9	2	15.3846	8	38	91	0	60316	6.28452	3.6419	6511	959755	3247	15598	21291	1656170				1.00029
C13	bl	LMCI	81.1	Male	12	Not Hisp/Latino	White	Married	1	3	12.67	19.67	7	27	21	2	4	100	3	32	300	9	20501	1.87573	1.23427	7194	1092960	2930	20422	19596	1660980				1.16397
C14	bl	LMCI	79.2	Male	14	Not Hisp/Latino	White	Widowed	1	0.5	7.33	17.33	6	29	39	7	3	30	4	47	60	0	42711	4.34109	2.79509	6649	983878	4478	17093	20848	1528070				1.28776
C15	bl	LMCI	79.1	Male	20	Hisp/Latino	Black	Married	1	0.5	7	12	4	28	31	1	3	42.8571	7	40	130	4	16636	1.69927	1.16633	7208	979010	3672	12661	18165	1426360				1.23532
C16	bl	LMCI	89.3	Male	13	Not Hisp/Latino	White	Married	0	0.5	10	15	4	26	35	3	2	25	4	34	78	1	43825	3.71037	2.14782		1181150				2040440
C17	bl	LMCI	74.7	Male	19	Not Hisp/Latino	White	Married	1	1	11.33	20.33	8	28	17	0	3	100	3	41	68	5	34117	3.40075	2.15289	5881	1003220	2971	16889	20271	1584710	670.7	366.6	40.9
C18	bl	LMCI	61.4	Male	16	Not Hisp/Latino	Asian	Married	0	1	9.67	15.67	4	27	39	3	1	11.1111	8	44	85	1	12346	1.05316	0.76177	9102	1172280	4110	21808	21320	1620700				1.23626
C19	bl	LMCI	62.8	Male	12	Not Hisp/Latino	White	Married	0	1	12	23	9	30	27	3	8	100	4	25	195	0	43102	4.01195	2.43191	8150	1074340	3810	21439	24030	1772350	1639	182.1	16.11
C20	bl	LMCI	79.4	Male	16	Not Hisp/Latino	White	Divorced	1	0.5	5.33	10.33	4	30	31	5	3	33.3333	7	50	105	2	50103	5.20442	3.23807	7090	962701	3904	16690	19828	1547310	802.6	398.4	38.55	1.37417
C21	bl	LMCI	79.1	Male	10	Not Hisp/Latino	White	Married	0	1.5	15	24	6	26	23	7	2	25	2	26	277	0	20599	1.80852	1.29943	7168	1139000	3280	19079	22252	1585230
C22	bl	LMCI	70.5	Male	15	Not Hisp/Latino	White	Married	0	2.5	6	9	3	28	34	4	3	37.5	3	52	58	0	61934	6.23259	3.75512	7036	993712	4061	17368	19173	1649320	1148	160	13.21
C23	bl	LMCI	80.4	Male	16	Not Hisp/Latino	White	Married	1	0.5	8.67	15.67	7	30	32	1	2	33.3333	5	35	182	0	75047	7.53169	4.41819		996416				1698590	490	527.5	59.84
C24	bl	LMCI	86.2	Female	16	Not Hisp/Latino	White	Widowed	0	3.5	9.33	14.33	5	28	35	2	-2	-25	6	40	105	6	44746	4.88266	3.247	6177	916427	3459	17458	18855	1378070
C25	bl	LMCI	88.8	Male	11	Not Hisp/Latino	White	Divorced	0	1	11.33	20.33	7	26	24	4	6	85.7143	3	28	112	0	26178	2.95053	1.84081		887229				1422090	>1700	436.3	40.96	1.26078
C26	bl	LMCI	80.3	Male	19	Not Hisp/Latino	White	Married	1	1.5	12.33	20.33	7	27	21	-1	3	100	6	37	90	4	69525	7.08525	4.12462	5981	981264	2908	19504	17123	1685610				0.989498
C27	bl	LMCI	72.3	Male	20	Not Hisp/Latino	White	Married	0	0.5	9.67	14.67	5	27	29	6	3	33.3333	7	40	78	0	78258	6.47601	4.09169		1208430				1912610	1379	192	14.99	1.22077
C28	bl	LMCI	72.4	Male	12	Not Hisp/Latino	White	Married	0	1.5	13	22	8	25	34	3	6	85.7143	0	32	122	3	39452	3.42201	2.21556		1152890				1780680				1.36058
C29	bl	LMCI	79.1	Female	18	Not Hisp/Latino	White	Married	1	1	22.33	35.33	10	24	20	1	4	100	0	18	300	5	49899	5.37858	3.30131	5081	927736	2670	13429	14550	1511490				1.10989
C30	bl	LMCI	74.2	Male	20	Not Hisp/Latino	White	Married	1	1	13	21	8	26	11	3	3	60	6	39	182	8	54880	4.94914	3.40069	5166	1108880	2709	16239	20894	1613790	594.9	305.5	27.78	1.15498
C31	bl	LMCI	75.2	Female	16	Not Hisp/Latino	White	Married	0	1	16.33	27.33	9	26	27	2	7	100	1	18	300	3	49416	6.35133	3.5062	5247	778042	2984	15340	14136	1409390	1395	247.2	17.86
C32	bl	LMCI	85	Female	15	Not Hisp/Latino	White	Widowed	0	1	5	11	5	28	54	10	1	7.14286	12	39	140	0	23765	2.44812	1.71166	5427	970745	2137	18125	17753	1388420				1.27389
C33	bl	LMCI	74.8	Female	16	Not Hisp/Latino	White	Married	1	2	9.33	19.33	8	27	27	4	4	66.6667	1	30	187	5	79456	8.54425	4.84402		929935				1640290	574	361.2	37.44
C34	bl	LMCI	78.9	Male	14	Not Hisp/Latino	White	Married	0	3	18.33	25.33	5	24	37	5	4	40	4	13	0	15	61214	6.36025	3.7028	7018	962446	3226	13350	18243	1653180
C35	bl	LMCI	72.4	Male	14	Not Hisp/Latino	White	Married	1	2	11.33	20.33	6	29	30	5	6	75	4	35	300	0	18841	1.77035	1.23826	8391	1064250	3715	19889	25117	1521570	723.1	528.6	54.61	1.46036
C36	bl	LMCI	82.2	Female	8	Not Hisp/Latino	White	Divorced	1	1	10	17	7	26	32	3	4	57.1429	4	42	71	0	18372	2.14466	1.40461	6135	856639	2695	14376	14906	1307980	860.9	291.4	26.61	1.1089
C37	bl	LMCI	85.9	Male	16	Not Hisp/Latino	White	Married	1	1.5	12	17	4	29	43	6	-2	-18.1818	8	41	76	1	39541	4.00008	2.37753	6147	988505	3900	17266	16112	1663110
C38	bl	LMCI	73.4	Female	12	Not Hisp/Latino	White	Married	0	1	4.33	5.33	1	28	55	8	2	14.2857	4	45	63	0	52113	5.38564	3.47041	6599	967628	4448	17217	19288	1501640
C39	bl	LMCI	69.1	Female	16	Not Hisp/Latino	White	Married	1	1.5	6.67	14.67	6	27	28	2	5	100	5	42	105	0	32492	3.17839	2.02145	5721	1022280	2742	18707	18722	1607360	570	341.9	32.46
C40	bl	LMCI	76.5	Female	11	Not Hisp/Latino	White	Married	0	1.5	10.67	19.67	6	26	24	1	4	80	3	31	300	0	31921	3.73808	2.19987	6190	853940	3620	12309	11906	1451040
C41	bl	LMCI	77.6	Female	16	Not Hisp/Latino	White	Married	1	2	17.67	29.67	9	24	15	0	3	100	0	17	300	1	44215	6.60552	3.76256	3281	669364	1579	11849	12622	1175130	689.2	232.5	17.01	1.06376
C42	bl	LMCI	74.1	Male	17	Not Hisp/Latino	White	Married	0	1	8.67	13.67	5	29	28	3	5	71.4286	5	39	80	1	38817	3.23961	2.08851	8109	1198200	3498	18003	25460	1858600				1.25781
C43	bl	LMCI	75.6	Female	16	Not Hisp/Latino	White	Divorced	0	1	10.67	17.67	7	28	16	2	1	25	8	43	103	5	13914	1.54564	1.04531		900211				1331090				1.09492
C44	bl	LMCI	64.8	Male	20	Not Hisp/Latino	White	Married	0	1.5	4.33	9.33	5	29	40	6	6	54.5455	8	60	62	2	22113	2.18956	1.50098	6983	1009930	3291	18370	19791	1473240				1.31959
C45	bl	LMCI	78.8	Male	13	Not Hisp/Latino	White	Married	1	1.5	13.67	23.67	10	26	26	3	6	100	1	45	80	4	25539	2.60476	1.78304	4868	980473	2759	16332	20001	1432330	556.7	309.2	29.26	1.1184
C46	bl	LMCI	61	Female	12	Not Hisp/Latino	White	Married	1	1.5	14.67	24.67	9	27	31	4	7	87.5	0	52	78	1	11480	1.19857	0.807876	6753	957807	3046	15849	18127	1421010	578.9	328.2	35.23
C47	bl	LMCI	82	Female	16	Not Hisp/Latino	White	Widowed	1	2	17.33	30.33	10	24	29	3	7	100	8	25	204	11	24146	2.59194	1.54924		931581				1558570
C48	bl	LMCI	62.9	Female	16	Not Hisp/Latino	White	Married	0	2	5	8	2	29	48	8	3	25	8	47	123	21	48734	4.55782	2.85007	7534	1069240	5038	15787	20138	1709920	1314	156.9	14.64
C49	bl	LMCI	68.9	Female	18	Hisp/Latino	White	Married	0	2	16	25	8	26	27	-1	5	100	4	36	103	0	13057	1.35889	0.939305	7151	960856	3108	14197	18883	1390070	446.8	408.8	45.26
C50	bl	LMCI	71.1	Female	18	Not Hisp/Latino	White	Married	1	2	20.33	28.33	7	29	37	3	7	87.5	0	44	82	4	15344	1.72982	1.16334	5668	887031	4071	17576	14381	1318960	664.3	528.2	56.14	1.17528
C51	bl	LMCI	76	Female	18	Not Hisp/Latino	White	Married	0	1	5	10	4	29	51	6	6	46.1538	8	40	77	0	19644	1.9214	1.30548	7944	1022380	4574	16303	18976	1504730
C52	bl	LMCI	68.3	Female	16	Not Hisp/Latino	White	Married	1	2	5.67	12.67	7	24	43	2	10	100	8	53	59	1	12883	1.27325	0.878199	6137	1011820	3265	16320	21564	1466980
C53	bl	LMCI	61.1	Female	18	Not Hisp/Latino	White	Married	0	2.5	2	4	2	27	67	8	0	0	8	56	63	2	14815	1.38189	0.982994	7644	1072080	4846	16903	22142	1507130				1.45753
C54	bl	LMCI	63.6	Female	12	Not Hisp/Latino	White	Married	1	2	12	20	6	29	23	3	2	33.3333	2	25	300	5	22640	2.70277	1.73984	6050	837658	2771	12444	10850	1301270
C55	bl	LMCI	66.5	Female	18	Not Hisp/Latino	White	Married	0	0.5	3.33	3.33	0	30	60	6	2	14.2857	8	52	71	0	28738	2.55968	1.74818		1122720				1643880				1.33521
C56	bl	LMCI	74.6	Male	14	Not Hisp/Latino	White	Married	1	1	11.67	18.67	7	25	33	3	8	100	0	39	120	4	26186	2.3508	1.55333	7196	1113920	3810	15496	22338	1685800	537.2	851.8	103
C57	bl	LMCI	65.4	Female	18	Not Hisp/Latino	White	Married	1	1	3	6	3	29	55	8	3	21.4286	8	63	50	3	24607	2.22169	1.58198	7360	1107580	4465	17729	23542	1555460	1429	230.9	19.43
C58	bl	LMCI	66.3	Male	20	Not Hisp/Latino	White	Married	1	1	10.67	15.67	5	29	39	6	4	36.3636	5	39	94	0	26273	2.86526	1.8043	6264	916950	3180	16098	14827	1456130				1.10806
C59	bl	LMCI	69.1	Female	18	Not Hisp/Latino	Asian	Divorced	1	3	17.67	25.67	7	27	32	2	7	100	0	17	93		16488	1.72369	1.1637	5408	956551	2903	17735	17197	1416860				1.26249
C60	bl	LMCI	70.2	Male	10	Not Hisp/Latino	Black	Divorced	0	1.5	10.33	19.33	7	24	27	2	4	66.6667	3	24	145	0	13932	1.38306	0.951574	7174	1007330	3310	14951	16474	1464100				1.16087
C61	bl	LMCI	74.6	Female	16	Not Hisp/Latino	Black	Divorced	1	2.5	14.67	20.67	6	24	28	3	3	37.5	5	36	110	17	26778	2.68659	1.81007	7269	996728	1980	15691	17393	1479390				1.20148
C62	bl	LMCI	77.3	Male	16	Not Hisp/Latino	White	Married	1	0.5	14.33	20.33	6	27	30	2	5	83.3333	8	51	49	0	29159	2.95423	1.76416	4832	987024	2594	18746	22916	1652850				1.12615
C63	bl	LMCI	74.3	Male	18	Not Hisp/Latino	White	Married	1	1.5	5.33	8.33	2	27	29	2	5	71.4286	7	40	165	2	24843	2.3778	1.55114	6798	1044790	3277	16735	21214	1601600	1308	213.7	18.62	1.18734
C64	bl	LMCI	71.3	Female	14	Not Hisp/Latino	White	Married	0	0.5	7.33	12.33	3	27	34	3	3	30	4	23	170	1	25163	2.74055	1.87597	7168	918173	3534	15411	18553	1341330				1.35221
C65	bl	LMCI	78.4	Male	18	Not Hisp/Latino	White	Married	0	0.5	11.33	15.33	4	30	30	4	8	100	8	47	77	1	29915	3.223	2.17271	6813	928173	4048	18078	19754	1376850
C66	bl	LMCI	81.1	Male	16	Not Hisp/Latino	White	Married	1	1.5	11.33	19.33	8	28	26	0	4	100	3	44	53	2	76968	7.70692	4.41708		998687				1742510				1.10699
C67	bl	LMCI	80.9	Male	16	Not Hisp/Latino	White	Widowed	1	0.5	11.33	23.33	9	24	16	1	4	100	2	46	131	5	60380	5.56211	3.60654	6612	1085560	2335	14293	16493	1674180
C68	bl	LMCI	85.9	Male	18	Not Hisp/Latino	White	Married	0	3	10	18	7	25	26	5	6	85.7143	5	36	75	10	48085	5.14407	3.06923		934765				1566680	620.3	319.7	31.9	1.14736
C69	bl	LMCI	82.4	Female	17	Not Hisp/Latino	White	Widowed	0	2	9.67	12.67	3	28	41	5	3	27.2727	7	38	94	0	33881	4.10858	2.52596	5731	824641	3728	13887	16351	1341310				1.20949
C70	bl	LMCI	82.2	Male	20	Not Hisp/Latino	White	Married	0	1.5	12.33	20.33	5	24	29	0	5	83.3333	2	34	155	4	85816	7.69719	4.92989	5848	1114900	2222	15428	18527	1740730				1.09009
C71	bl	LMCI	82.1	Male	20	Not Hisp/Latino	White	Widowed	0	1.5	13	21	8	26	35	1	6	85.7143	4	50	63	0	38990	3.79092	2.41758	6025	1028510	3360	21027	22485	1612770	>1700	396.2	34.68	1.15944
C72	bl	LMCI	80.9	Male	20	Not Hisp/Latino	White	Married	1	1	11	18	6	28	29	3	5	71.4286	2	50	84	3	63683	6.52422	4.01626	4984	976101	3401	17316	16415	1585630	566.7	210.3	21.53
C73	bl	LMCI	82.6	Female	13	Not Hisp/Latino	White	Married	1	1.5	12	20	5	25	24	2	5	83.3333	0	40	122	0	39345	4.83172	2.95248	4515	814307	2663	12898	16353	1332610				1.15081
C74	bl	LMCI	81.2	Female	18	Not Hisp/Latino	White	Married	1	1.5	7	10	2	28	35	6	1	10	6	53	37	4	33863	3.51289	2.37344		963964				1426750				1.19732
C75	bl	LMCI	82.9	Female	18	Not Hisp/Latino	White	Married	0	1	9.67	12.67	2	29	50	4	4	36.3636	3	39	78	0	35570	3.94037	2.36561		902706				1503630				1.4752
C76	bl	LMCI	81.3	Female	16	Not Hisp/Latino	White	Widowed	0	0.5	9	16	7	29	35	3	9	100	0	40	60	0	47636	5.32558	3.54669	5869	894475	3343	15691	20624	1343110				1.2782
C77	bl	LMCI	84.2	Male	13	Not Hisp/Latino	White	Married	0	2.5	11.67	20.67	7	27	27	2	6	100	0	25	94	14	30669	3.12237	2.01942	6491	982236	3463	15906	18093	1518700
C78	bl	LMCI	86.7	Male	14	Not Hisp/Latino	White	Widowed	0	3	10.67	17.67	6	28	33	5	4	44.4444	4	27	117	2	81288	7.8294	4.95583	6928	1038240	3669	17058	18220	1640250				1.15065
C79	bl	LMCI	85.4	Female	16	Not Hisp/Latino	White	Married	0	2	6.67	14.67	7	27	47	9	3	23.0769	7	39	115	0	53980	5.7035	3.82116		946436				1412660				1.25198
C80	bl	LMCI	80.4	Male	18	Not Hisp/Latino	White	Married	0	0.5	15	24	7	26	31	3	8	100	0	42	103	2	55817	5.48861	3.37104	4600	1016960	1629	18083	18630	1655780	566.3	237.5	22.82
C81	bl	LMCI	84.3	Male	20	Not Hisp/Latino	White	Never married	0	1	9	15	5	29	39	3	4	44.4444	8	42	89	0	57158	5.0757	3.27713	7713	1126110	3197	17174	23712	1744150
C82	bl	LMCI	82.6	Female	14	Not Hisp/Latino	White	Married	0	1.5	6.67	9.67	3	26	41	8	6	50	4	54	80	4	31693	3.34963	2.10027		946164				1509000	>1700	252.3	19.72
C83	bl	LMCI	71.9	Female	16	Not Hisp/Latino	White	Married	1	0.5	13.67	19.67	5	29	51	4	5	41.6667	7	42	92	0	38540	3.66343	2.45401		1052020				1570490
C84	bl	LMCI	75.8	Male	16	Not Hisp/Latino	White	Never married	0	2	7	10	3	27	33	5	4	44.4444	7	43	83	0	32328	3.40475	2.13543		949496				1513890				1.15536
C85	bl	LMCI	71.7	Male	20	Not Hisp/Latino	White	Married	1	2.5	6	12	5	26	34	4	4	50	2	63	52	13	30268	3.07814	1.94383	6629	983321	3191	18302	14656	1557130
C86	bl	LMCI	68.4	Male	20	Not Hisp/Latino	White	Married	1	1.5	8.33	13.33	5	30	30	5	6	75	3	35	70	0	35281	3.21945	2.21191		1095870				1595050
C87	bl	LMCI	79.8	Female	16	Not Hisp/Latino	White	Married	0	2	10.67	17.67	5	27	30	4	8	100	0	51	49	5	32069	3.45369	2.29991	5079	928543	2191	14541	17779	1394360
C88	bl	LMCI	84	Female	11	Not Hisp/Latino	White	Widowed	0	2.5	13.67	21.67	6	24	24	6	5	55.5556	0	18	125	7	24473	2.80464	1.74746	6652	872590	2693	10237	14407	1400490	728.6	509.7	57.13
C89	bl	LMCI	72.3	Male	14	Not Hisp/Latino	Asian	Married	1	4	13.33	22.33	8	26	28	3	6	100	4	47	197	7	27286	2.69374	1.74815		1012940				1560850	526.4	347.2	37.97
C90	bl	LMCI	69	Female	8	Not Hisp/Latino	White	Married	1	1.5	11.33	17.33	6	26	29	3	6	85.7143	4	37		0	29760	3.09058	2.08204	6729	962926	3372	14791	24225	1429370	>1700	287.6	25.56
C91	bl	LMCI	63.1	Male	12	Not Hisp/Latino	White	Married	0	0.5	11.67	17.67	6	25	29	3	7	100	3	27	76	6	34945	3.15893	2.17647		1106230				1605580				1.36785
C92	bl	LMCI	73.6	Male	18	Not Hisp/Latino	White	Married	1	0.5	7	11	4	27	24	3	5	71.4286	8	49	50	0	60398	5.58341	3.57304	6527	1081740	3279	15054	19111	1690380	453.2	153.1	14.62	1.22145
C93	bl	LMCI	70.3	Female	20	Not Hisp/Latino	White	Married	1	1.5	16.67	24.67	6	25	22	1	4	66.6667	7	31	170		61517	6.72524	4.1524		914718				1481480	539.3	270.8	27.85
C94	bl	LMCI	75.2	Male	16	Not Hisp/Latino	White	Married	1	1	15	24	8	27	28	3	7	100	0	43	103	0	60470	5.94405	3.55909	4654	1017320	2288	15560	21522	1699030				1.13655
C95	bl	LMCI	79.6	Male	18	Not Hisp/Latino	White	Married	1	2.5	16	23	5	25	28	4	4	57.1429	5	29	117	2	99907	10.9964	6.61649	5875	908543	3166	11645	19068	1509970
C96	bl	LMCI	72	Female	16	Not Hisp/Latino	White	Married	1	1.5	7.67	15.67	8	29	32	5	9	100	0	41	73	6	37297	4.02159	2.45027	4622	927419	2181	14040	16288	1522160
C97	bl	LMCI	76.8	Female	10	Not Hisp/Latino	White	Married	1	0.5	10.67	18.67	7	27	21	-4	-1		0	17	300	0	45737	4.97667	3.16618	5911	919028	2567	15573	15605	1444550
C98	bl	LMCI	84	Female	12	Not Hisp/Latino	White	Married	0	2.5	14	24	8	27	17	3	5	100	0	18	300	7	40289	4.84891	3.06926		830887				1312660	643.4	321.3	33.87	1.00616
C99	bl	LMCI	64.4	Male	16	Not Hisp/Latino	White	Divorced	1	1	11.33	18.33	6	24	19	2	4	100	0	26	154	4	42605	4.3392	2.99885	6842	981862	4099	15353	18537	1420710				1.03404
C100	bl	LMCI	73.4	Male	20	Not Hisp/Latino	Asian	Married	1	3.5	13.33	23.33	8	27	25	3	6	100	1	24	111	21	48100	5.15102	2.99532	5694	933795	3038	15227	16831	1605840
C101	bl	LMCI	76.7	Female	12	Not Hisp/Latino	White	Widowed	0	4	8.33	14.33	4	28	51	6	2	15.3846	4	21	130	12	54911	6.25739	3.86401	4445	877538	2475	13254	16440	1421090	461.6	150.2	12.46	1.05802
C102	bl	LMCI	73.6	Male	16	Not Hisp/Latino	White	Married	1	3	21.33	32.33	10	28	23	1	5	100	0	31	151	13	54036	5.68243	3.32149	4692	950932	1558	15703	18087	1626860	368.6	207.7	20.69	1.02914
C103	bl	LMCI	78.8	Female	18	Not Hisp/Latino	White	Married	0	2	15	22	7	27	28	3	5	83.3333	1	36	73	3	37727	4.74863	2.83683	5315	794481	1621	13382	14019	1329900				1.11627
C104	bl	LMCI	79.2	Female	18	Not Hisp/Latino	White	Married	0	1.5	12.67	19.67	6	29	28	2	4	66.6667	5	38	91	2	39315	4.01878	2.61976	6284	978282	2449	14886	18581	1500710	1038	246.5	22.19	1.12243
C105	bl	LMCI	71.4	Male	16	Not Hisp/Latino	White	Married	0	2.5	3	4	1	26	68	6	0	0	8	61	39	2	42345	3.64694	2.47026	8857	1161110	4518	18350	20555	1714190				1.08191
C106	bl	LMCI	56.6	Female	15	Not Hisp/Latino	White	Married	0	2	26.67	35.67	8	26	34	6	6	66.6667	3	27	300	2	42129	4.98183	2.91805	4777	845653	2538	13206	10472	1443740	701.4	225.7	23.84
C107	bl	LMCI	57.8	Male	20	Not Hisp/Latino	White	Married	0	1.5	10	17	7	28	33	5	6	66.6667	5	50	70	1	40063	3.52094	2.4094		1137850				1662780
C108	bl	LMCI	58.7	Male	18	Not Hisp/Latino	White	Married	0	2	11.67	21.67	9	26	23	2	5	100	3	31	194	1	55108	4.8136	2.98591	6780	1144840	3648	15279	14633	1845600
C109	bl	LMCI	59.4	Male	16	Not Hisp/Latino	White	Married	1	2.5	13.67	17.67	3	30	33	8	4	40	7	42	87	10	46104	3.41466	2.18472	6884	1350180	4617	21062	26379	2110290				1.20375
C110	bl	LMCI	60.3	Male	13	Not Hisp/Latino	White	Married	1	1	17.33	28.33	9	27	24	4	6	100	2	37	165	3	50741	4.36212	2.74227	6833	1163220	3442	17077	18076	1850330
C111	bl	LMCI	62.2	Male	18	Hisp/Latino	White	Married	0	4	9.33	12.33	3	26	30	4	7	87.5	7	38	274	1	41968	3.55222	2.19778	5896	1181460	2822	18121	20129	1909560	594.2	141.7	9.75
C112	bl	LMCI	63.9	Male	13	Not Hisp/Latino	White	Married	1	3.5	12	18	6	26	12	-1	2	100	0	42	74	5	56230	4.92201	3.06656	7084	1142420	3827	20059	19277	1833650	524.4	317.9	33.9
C113	bl	LMCI	64.3	Male	16	Not Hisp/Latino	Black	Married	1	1	7	12	4	25	34	3	2	25	7	41	87	0	61769	5.86784	3.39999	6710	1052670	3810	17072	20783	1816740				1.29982
C114	bl	LMCI	68.9	Male	18	Not Hisp/Latino	White	Married	1	2	8	18	9	28	40	9	2	15.3846	6	22	149	4	44622	4.08604	2.65068	7256	1092060	2678	15404	21793	1683420				1.07319
C115	bl	LMCI	69.2	Female	12	Not Hisp/Latino	White	Married	1	1	11	19	7	26	33	1	4	57.1429	4	32	230	4	61086	6.15301	4.07205	5088	992782	2643	13470	13953	1500130
C116	bl	LMCI	69.4	Male	19	Not Hisp/Latino	White	Married	1	1.5	13.67	22.67	8	29	24	1	5	100	0	38	174	6	42408	4.18415	2.52582	7095	1013540	2816	16729	18305	1678980	561	360.9	40.39	1.1118
C117	bl	LMCI	70.6	Male	18	Not Hisp/Latino	White	Married	1	1	8.67	16.67	6	30	37	6	0	0	5	46	65	1	54752	5.16085	3.36509	7420	1060910	4169	19522	22864	1627060				1.24251
C118	bl	LMCI	70.8	Male	20	Not Hisp/Latino	White	Married	1	0.5	11	18	7	29	34	1	7	100	5	32	59	0	79350	8.92827	5.30422	4788	888750	2700	12115	17274	1495980
C119	bl	LMCI	71.2	Male	16	Not Hisp/Latino	White	Married	1	3.5	11.67	19.67	6	27	30	2	3	50	3	34	93	6	82030	9.58857	5.30932	5840	855498	2822	14883	15160	1545020
	0.33	119	74.6739	48F	15.9496	#DIV/0!	#DIV/0!	#DIV/0!	0.546218	1.59244	11.2158	18.3306	6.03361	27.0504	31.5798	3.4958	4.32773	64.3945	3.9916	37.9412	125.992	3.46154	41330.2	4.21119	2.63432	6297.31	991796	3206.69	16221.7	18551	1.55776e+06	749.393	318.845	31.7596	1.20079
			7.7148		2.90192	#DIV/0!	#DIV/0!	#DIV/0!	0.516637	0.873252	4.29869	6.34615	2.2206	1.6967	10.36	2.46973	2.20596	33.8701	2.88331	10.6088	74.6434	4.41498	18299.9	1.91805	1.1024	1080.11	108146	749.973	2441.23	3245.06	160803	344.342	145.071	17.7831	0.124688
	VISCODE	DX_bl	AGE	PTGENDER	PTEDUCAT	PTETHCAT	PTRACCAT	PTMARRY	APOE4	CDRSB	ADAS11	ADAS13	ADASQ4	MMSE	RAVLT_immediate	RAVLT_learning	RAVLT_forgetting	RAVLT_perc_forgetting	LDELTOTAL	DIGITSCOR	TRABSCOR	FAQ	Ventricles			Hippocampus	WholeBrain	Entorhinal	Fusiform	MidTemp	ICV	ABETA_bl	TAU_bl	PTAU_bl	FDG_bl
C1	bl	LMCI	80.4	Female	13	Not Hisp/Latino	White	Married	0	0.5	18.67	25.67	7	25	30	1	5	83.3333	3	34	168	0	29826	3.21571	2.00736	5348	927510	2277	17963	17802	1485830
C2	bl	LMCI	76.8	Male	12	Not Hisp/Latino	White	Married	0	1	11.33	16.33	4	25	27	2	1	16.6667	3	19	300	1	29502	3.01725	1.91436	8154	977778	4381	14579	20174	1541090	874.1	153.2	13.45
C3	bl	LMCI	81	Female	20	Not Hisp/Latino	White	Married	0	2.5	20.33	32.33	10	27	26	3	6	100	0	20	201	12	29287	3.51509	1.95915	4845	833179	1608	13023	14532	1494880				0.935685
C4	bl	LMCI	85	Male	18	Not Hisp/Latino	White	Married	1	1.5	14	21	7	27	23	4	3	42.8571	1	48	81	1	19843	2.14408	1.39598	6482	925480	2764	18181	16420	1421440				1.20814
C5	bl	LMCI	60.7	Female	19	Not Hisp/Latino	White	Married	0	0.5	2	3	1	28	50	10	3	21.4286	8	52	41	0	22995	2.15136	1.54559	7510	1068860	4547	17226	19924	1487780	1652	198.9	16.31
C6	bl	LMCI	70.6	Male	18	Not Hisp/Latino	White	Married	1	1.5	6	9	2	30	50	9	1	7.14286	8	46	59	0	41874	3.61941	2.45702	8255	1156930	4367	21541	24376	1704260	498.6	235.6	24.43	1.19883
C7	bl	LMCI	80.4	Female	13	Not Hisp/Latino	White	Married	0	1.5	6.33	11.33	3	29	37	4	4	50	4	47	71	1	13407	1.55651	1.05671		861351				1268750	>1700	248.3	21.69	1.30296
C8	bl	LMCI	65.1	Male	18	Not Hisp/Latino	White	Married	1	1	14.33	19.33	5	27	26	3	6	100	8	48	73	5	28220	2.25886	1.61243	7382	1249300	3259	18935	21456	1750150	683.1	434.1	48.14	1.29373
C9	bl	LMCI	60.3	Male	18	Not Hisp/Latino	White	Married	0	1.5	8.33	17.33	9	29	28	3	5	71.4286	3	21	180	6	28981	2.68776	1.68321	8124	1078260	4275	18704	20817	1721770	426.1	318.4	31.15	1.06416
C10	bl	LMCI	68.4	Male	18	Not Hisp/Latino	White	Married	0	0.5	12	19	7	29	27	4	8	100	2	53	67	4	32882	2.85355	1.82507	6266	1152320	2411	19216	18739	1801680
C11	bl	LMCI	74.5	Male	17	Not Hisp/Latino	White	Married	1	1.5	17	26	9	29	29	3	7	100	7	37	73	4	32637	2.90326	1.90614	7676	1124150	3578	18651	19109	1712200				1.22724
C12	bl	LMCI	79.8	Male	14	Not Hisp/Latino	White	Married	0	1.5	12.67	15.67	3	29	37	3	6	75	6	42	69	0	32311	3.18916	2.09466	6717	1013150	4106	15038	18590	1542540
C13	bl	LMCI	71.5	Female	16	Not Hisp/Latino	White	Married	1	2	14.33	25.33	10	26	34	2	7	87.5	1	32	73	0	36932	3.46893	2.35108	5342	1064650	2973	19392	18217	1570850				1.22065
C14	bl	LMCI	79.1	Male	12	Not Hisp/Latino	White	Married	1	3	21.33	30.33	9	28	21	3	6	100	3	19	223	10	32394	3.07863	1.74526		1052220				1856110	633.3	260.5	22.5	1.13968
C15	bl	LMCI	76.1	Male	16	Not Hisp/Latino	White	Married	0	2	4.67	7.67	3	29	31	4	3	37.5	4	47	108	1	27614	2.02415	1.47132	9433	1364230	4618	19788	25776	1876820	1495	166.7	14.25
C16	bl	LMCI	79.7	Male	16	Not Hisp/Latino	White	Married	0	0.5	11	16	5	28	45	6	4	36.3636	8	51	47	0	26205	2.66757	1.85485	5388	982353	2469	15543	17250	1412780	1600	176.3	15.57
C17	bl	LMCI	57.7	Male	14	Not Hisp/Latino	White	Married	0	3	13.33	25.33	10	25	26	-1	3	75	1	20	300	8	32700	3.21901	2.04953	6289	1015840	3255	14583	14169	1595490	627.5	410.2	35.77	1.00912
C18	bl	LMCI	74.3	Female	18	Not Hisp/Latino	White	Married	0	0.5	18.67	25.67	7	25	23	1	4	80	7	42	177	3	37735	3.88529	2.51036		971227				1503170	572.8	240.9	27.33	1.13262
C19	bl	LMCI	86.5	Male	14	Not Hisp/Latino	White	Married	0	1	11.67	16.67	5	25	24	3	5	83.3333	3	28	87	1	55755	5.21699	3.09048	6490	1068720	4429	17311	19702	1804090	1079	309.1	30.47
C20	bl	LMCI	83.1	Male	17	Not Hisp/Latino	White	Married	1	2.5	18.67	28.67	8	23	21	2	5	100	0	31	111	17	51791	6.03485	3.74012	4361	858198	2288	10894	14823	1384740	269.3	251.1	23.74
C21	bl	LMCI	72.1	Male	18	Not Hisp/Latino	White	Married	0	2	7.67	16.67	7	30	27	2	1	20	6	50	71	10	40157	3.92005	2.39357		1024400				1677700	488.5	345.7	35.69
C22	bl	LMCI	85	Male	16	Not Hisp/Latino	White	Married	1	1	8.67	14.67	5	27	19	0	0	0	6	41	78	0	40996	4.38398	2.523	5211	935133	2093	16754	20428	1624890
C23	bl	LMCI	80	Female	13	Not Hisp/Latino	White	Divorced	0	1.5	7.67	15.67	8	24	39	6	7	70	4	50	85	1	55460	5.90236	3.58823	6194	939624	3712	14030	19231	1545610				1.12929
C24	bl	LMCI	73.5	Male	16	Not Hisp/Latino	White	Married	0	1	8	15	6	30	33	3	5	71.4286	5	38	71	0	19315	1.83138	1.24415	7862	1054670	4265	17114	20652	1552470	536.8	253.8	25.34
C25	bl	LMCI	59.7	Female	14	Not Hisp/Latino	White	Married	1	2.5	12.67	18.67	6	30	35	6	11	100	1	42	65	3	23815	2.41169	1.65312	6671	987480	3100	19651	20558	1440610
C26	bl	LMCI	72.8	Male	16	Not Hisp/Latino	White	Married	1	1.5	10.67	18.67	7	26	25	3	1	16.6667	3	49	61	1	50663	4.34473	2.68692		1166080				1885540				1.06311
C27	bl	LMCI	80.2	Female	16	Not Hisp/Latino	White	Divorced	0	0.5	18.67	28.67	10	26	30	2	2	28.5714	0	34	120	0	45850	4.34432	2.65803	5948	1055400	3555	16476	19785	1724960
C28	bl	LMCI	67.4	Male	20	Not Hisp/Latino	White	Married	0	1.5	5	10	3	28	41	6	4	36.3636	8	31	215	6	33771	2.86069	1.83673	7999	1180520	4040	15746	19249	1838650	862.4	396.2	39.82	1.05044
C29	bl	LMCI	73.3	Female	18	Not Hisp/Latino	White	Widowed	1	2	13.67	21.67	7	28	27	0	4	100	5	38	73	6	39862	4.23484	2.67224	5978	941286	3310	14520	18187	1491710	907.3	259.2	28.6	1.22199
C30	bl	LMCI	68.5	Male	16	Hisp/Latino	White	Married	0	1.5	10	19	9	25	25	2	3	50	3	33	119	1	32543	2.72452	1.85842	6806	1194450	4227	19247	21273	1751110				1.32318
C31	bl	LMCI	61.2	Female	18	Not Hisp/Latino	Black	Divorced	1	3	11.33	20.33	8	26	33	5	8	80	2	49	69	10	15196	1.58531	1.12381	6664	958549	3527	16432	20957	1352180				1.1829
C32	bl	LMCI	73.6	Male	14	Not Hisp/Latino	White	Married	0	2.5	15.67	21.67	4	25	15	3	1	33.3333	1	31	254	8	40410	3.51272	2.34197	8406	1150390	4007	15092	18663	1725470
C33	bl	LMCI	79.8	Female	13	Not Hisp/Latino	White	Married	0	1	15.67	18.67	2	30	40	3	7	70	4	44	65	0	12348	1.13559	0.809747	8798	1087360	3851	19738	23696	1524920
C34	bl	LMCI	69.7	Female	14	Not Hisp/Latino	White	Widowed	1	2	15	20	4	25	30	6	5	55.5556	2	35	102	1	42631	4.36622	2.82547	5976	976382	2634	15173	15941	1508810	634.6	427.7	41.75
C35	bl	LMCI	83.2	Male	12	Not Hisp/Latino	White	Widowed	0	1.5	7.33	13.33	5	28	33	8	7	63.6364	0	43	156	1	36179	3.60008	2.15555	6936	1004950	3638	18146	19002	1678410				1.2097
C36	bl	LMCI	78.4	Male	13	Not Hisp/Latino	Black	Married	0	2	11.33	18.33	7	27	21	2	3	60	4	36	159	1	31386	2.68144	1.84036	7693	1170490	3425	20193	24330	1705430				1.45931
C37	bl	LMCI	79.2	Male	10	Not Hisp/Latino	White	Married	1	1.5	18.33	27.33	8	28	16	7	4	57.1429	4	30	220	11	59532	6.3756	3.96367	6025	933748	2867	15314	18259	1501940	560.3	250.4	27.41	0.954105
C38	bl	LMCI	83.3	Female	14	Not Hisp/Latino	White	Widowed	0	1	15.67	24.67	8	25	32	2	7	100	1	30	160	4	28940	2.98472	1.91176	6112	969606	3143	13282	17613	1513790	761.5	336.2	34.36	1.1134
C39	bl	LMCI	61.8	Female	16	Hisp/Latino	White	Divorced	1	1	10.33	15.33	3	28	45	5	2	18.1818	3	27	152	4	26745	2.579	1.79188	7639	1037030	4319	20215	19466	1492570				1.26269
C40	bl	LMCI	72	Male	16	Not Hisp/Latino	White	Married	1	2.5	15	25	8	25	21	3	6	100	4	31	106	0	42165	3.94593	2.46729		1068570				1708960				1.11273
C41	bl	LMCI	64.1	Female	20	Not Hisp/Latino	White	Widowed	1	0.5	10.67	16.67	6	29	36	7	9	81.8182	1	52	66	0	22868	2.67918	1.70958	6262	853546	2777	15900	16497	1337640				1.12774
C42	bl	LMCI	72.1	Male	20	Not Hisp/Latino	Asian	Married	0	0.5	9.33	14.33	5	28	38	4	3	33.3333	5	45	73	1	17099	1.92071	1.28579	7892	890243	3970	17712	16537	1329840				1.19474
C43	bl	LMCI	65.6	Male	10	Not Hisp/Latino	White	Married	1	1.5	7	11	3	28	49	7	7	50	2	44	70	4	22584	2.1299	1.5019	7745	1060330	4441	18306	18572	1503700	844.4	365.1	37.99	1.3389
C44	bl	LMCI	70.5	Female	16	Not Hisp/Latino	Black	Married	1	1	9.33	20.33	10	24	31	2	7	100	2	37	76	1	18167	2.06418	1.38846	5151	880109	2157	14320	13821	1308430	414.1	680.2	78.46	1.21403
C45	bl	LMCI	61.6	Male	20	Not Hisp/Latino	White	Married	0	1	5.67	10.67	4	29	43	7	13	100	7	37	61	0	19815	1.66874	1.16711	8446	1187420	4396	19166	21445	1697780	>1700	242.6	21.84	1.45672
C46	bl	LMCI	66.5	Female	14	Not Hisp/Latino	White	Married	1	1	11.67	20.67	9	29	39	6	9	81.8182	1	64	60	0	22383	2.27459	1.50738	5839	984046	2574	16964	18724	1484890	606	358.9	37.96
C47	bl	LMCI	69.4	Male	20	Not Hisp/Latino	White	Married	1	3	16	25	8	29	29	1	3	50	8	23	93	13	17288	1.67545	1.17729	6535	1031840	4714	17267	18289	1468460	540.2	308.3	29.13
C48	bl	LMCI	68.7	Male	14	Not Hisp/Latino	White	Never married	1	1.5	14.33	23.33	7	25	27	1	6	100	2	31	300	1	15057	1.45144	0.970543	7451	1037380	4742	16140	17783	1551400				1.23478
C49	bl	LMCI	78.1	Female	18	Not Hisp/Latino	White	Married	1	3	15	21	5	27	23	2	6	100	2	59	112	8	19452	2.15928	1.49277	5482	900856	2493	18090	14703	1303080	609.9	>1300	>120	1.05766
C50	bl	LMCI	62.9	Male	18	Not Hisp/Latino	White	Married	0	0.5	7.33	12.33	5	29	37	6	6	54.5455	8	60	40	0	16103	1.38414	0.991143	8167	1163390	4292	18854	23541	1624690				1.42776
C51	bl	LMCI	65.1	Female	16	Not Hisp/Latino	White	Married	1	0.5	6.67	14.67	8	27	38	4	9	100	1	42	73	7	16684	1.79801	1.29219	6107	927913	2511	18072	17213	1291140	957.8	316.9	31.69
C52	bl	LMCI	72.5	Female	12	Not Hisp/Latino	White	Married	1	0.5	21.33	31.33	10	25	24	1	0	0	1	38	90	0	14439	1.41972	0.989745	7772	1017030	2692	17457	16490	1458860	596.9	341	36.58
C53	bl	LMCI	66.1	Female	16	Not Hisp/Latino	White	Married	1	1.5	12.33	20.33	8	25	33	3	7	100	5	48	78	2	17187	1.61655	1.09638	6224	1063190	2623	15424	15099	1567620
C54	bl	LMCI	83.3	Male	15	Not Hisp/Latino	White	Married	0	3	9.67	17.67	7	29	26	5	3	42.8571	4	41	96	12	42912	4.22088	2.70718	7739	1016660	3601	16907	20115	1585120	1516	297.3	27.33	1.20476
C55	bl	LMCI	69.3	Female	14	Not Hisp/Latino	White	Married	1	2	10.67	21.67	9	25	24	0	4	100	0	38	133	1	10739	1.33351	0.872912	5511	805318	2851	12839	15165	1230250	603.1	373.6	34.65
C56	bl	LMCI	64.5	Female	12	Not Hisp/Latino	Am Indian/Alaskan	Married	1	0.5	16.67	24.67	7	25	23	3	6	85.7143	4	18	123	2	11110	1.18409	0.856572	6666	938277	3973	18928	16496	1297030
C57	bl	LMCI	64.6	Female	12	Not Hisp/Latino	White	Married	0	1	7.67	12.67	5	29	39	3	2	20	3	59	69	2	16928	1.84848	1.19393	7458	915777	4135	16621	20338	1417840	>1700	221.9	18.66
C58	bl	LMCI	69.6	Female	12	Not Hisp/Latino	White	Widowed	0	2	18	29	8	27	28	2	5	71.4286	4	15	253	3	19314	1.8023	1.27408	8585	1071630	3575	15827	23302	1515920				1.33373
C59	bl	LMCI	69.7	Female	12	Not Hisp/Latino	White	Widowed	1	3	14.33	27.33	9	24	37	6	4	40	1	19	146	7	16683	1.75626	1.19495	6688	949914	3817	13838	17121	1396120
C60	bl	LMCI	62.7	Male	12	Not Hisp/Latino	White	Married	0	1.5	11.33	16.33	5	25	23	0	4	100	3	42	78	2	28442	2.19135	1.57559	8640	1297920	3804	19562	20908	1805170	1014	189.1	15.55
C61	bl	LMCI	63	Male	18	Not Hisp/Latino	White	Married	0	1	4.33	7.33	2	28	45	4	2	20	8	35	84	0	27801	2.66909	1.94126	7677	1041590	3746	17791	23329	1432110	>1700	302.7	27.73	1.42627
C62	bl	LMCI	79.4	Male	16	Not Hisp/Latino	White	Widowed	1	1.5	7	14	5	28	23	5	5	71.4286	7	34	77	1	23834	2.62269	1.60358	7830	908762	3380	15773	18252	1486300				1.26315
C63	bl	LMCI	62.3	Female	16	Not Hisp/Latino	White	Married	1	1.5	9.33	16.33	6	28	41	1	9	100	2	43	91	3	24512	1.94742	1.3262	7859	1258690	4112	19839	23640	1848290	467	386.3	42.85	1.59293
C64	bl	LMCI	63.6	Male	13	Not Hisp/Latino	White	Married	1	1	10.33	18.33	7	24	35	4	5	55.5556	4	50	86	0	32122	2.75151	1.75886	8713	1167430	4082	17479	20339	1826300				1.30075
C65	bl	LMCI	69.6	Male	17	Not Hisp/Latino	White	Married	0	2.5	14.33	23.33	9	25	36	1	7	100	8	35	98	4	21798	1.8065	1.38267	6532	1206640	3816	18235	24587	1576520
C66	bl	LMCI	69.6	Male	12	Not Hisp/Latino	White	Married	1	2	14.33	21.33	7	25	27	1	6	100	0	33	124	10	20358	1.97038	1.33255	6641	1033200	3095	19229	19582	1527750				1.38048
C67	bl	LMCI	74	Male	9	Not Hisp/Latino	White	Divorced	1	0.5	9.67	16.67	7	26	28	1	5	83.3333	3	38	75	0	28693	2.65895	1.74456	6874	1079110	4058	15502	18899	1644710	>1700	182.8	15.74	1.26648
C68	bl	LMCI	76.2	Female	18	Hisp/Latino	White	Married	0	3	16	27	9	24	28	3	3	42.8571	1	27	300	11	28718	2.54976	1.62742	7070	1126300	4886	21754	18805	1764630
C69	bl	LMCI	76.6	Female	14	Hisp/Latino	White	Widowed	0	1	5	9	3	28	31	9	2	22.2222	4	30	128	0	18937	2.47828	1.58914	7695	764118	3255	11460	15051	1191650				1.3319
C70	bl	LMCI	71.2	Male	16	Not Hisp/Latino	White	Married	0	1.5	9.67	16.67	6	28	25	1	5	83.3333	5	54	60	0	26125	2.5242	1.66968	7196	1034980	4377	17577	18487	1564670	1470	178.9	16.07	1.24011
C71	bl	LMCI	80.7	Female	16	Not Hisp/Latino	White	Widowed	0	1.5	8	13	4	28	30	4	5	55.5556	5	37	128	1	15307	1.59557	1.12834	6765	959342	3067	14188	17363	1356600				1.30873
C72	bl	LMCI	72.7	Male	13	Not Hisp/Latino	White	Married	0	2.5	12.67	19.67	6	29	25	4	6	85.7143	4	29	113	7	23506	2.12732	1.45023	7214	1104960	3691	18580	22027	1620850				1.39693
C73	bl	LMCI	62.4	Male	18	Not Hisp/Latino	White	Married	1	1.5	8	11	2	27	41	3	5	55.5556	7	41	139	1	31060	2.6799	1.73779	8425	1159000	4013	16862	22059	1787330				1.3464
C74	bl	LMCI	80.6	Female	14	Not Hisp/Latino	White	Married	1	1	21	30	7	26	31	3	-2	-25	0	53	126	11	20651	2.64065	1.68157	4581	782041	2263	12793	11705	1228080	509.7	264.4	24.87
C75	bl	LMCI	65.3	Female	12	Not Hisp/Latino	White	Widowed	1	1.5	8	16	8	25	26	2	5	83.3333	4	43	104	3	16833	1.69998	1.18019	6796	990188	2814	17077	17501	1426290	908.9	336.4	32.63	1.08007
C76	bl	LMCI	77.9	Male	12	Not Hisp/Latino	White	Married	0	1.5	13.67	20.67	7	25	19	3	4	80	3	42	60	6	27506	2.88149	2.02989	6261	954575	2585	13764	17736	1355050				1.34927
C77	bl	LMCI	85.6	Male	20	Not Hisp/Latino	White	Married	1	4	20.33	28.33	6	27	24	1	6	100	3	26	143	19	39893	4.58822	2.64734		869465				1506910
C78	bl	LMCI	86.1	Male	16	Not Hisp/Latino	White	Married	1	2	4	8	3	27	47	4	7	63.6364	8	33	122	9	51004	4.77494	2.79653	6369	1068160	3823	19254	19561	1823830	551.7	447	49.3	1.1387
C79	bl	LMCI	88.3	Male	16	Not Hisp/Latino	White	Married	0	1.5	12.33	17.33	4	28	40	8	8	66.6667	8	36	95	3	55742	6.04821	3.60204	4645	921628	2745	14524	15944	1547510	1338	256.6	22.91	1.2558
C80	bl	LMCI	81.8	Male	16	Not Hisp/Latino	Black	Widowed	0	0.5	11.33	15.33	4	27	38	6	9	81.8182	8	37	119	0	56248	6.60778	3.73818		851239				1504690
C81	bl	LMCI	87.7	Male	12	Not Hisp/Latino	White	Married	1	1	11	18	6	25	22	2	5	100	3	26	300	0	44091	3.87378	2.36136		1138190				1867190	702.1	504	45.23	1.1827
C82	bl	LMCI	86	Male	14	Not Hisp/Latino	White	Married	0	0	9	16	5	29	35	3	7	87.5	9	35	300	0	52834	5.55355	3.47734		951356				1519380
C83	bl	LMCI	82.9	Female	11	Not Hisp/Latino	Black	Widowed	1	2	18	28	8	24	20	-1	3	100	4	24	163	8	31539	3.68662	2.31404	5499	855499	2954	14217	17955	1362940
C84	bl	LMCI	85.2	Male	16	Not Hisp/Latino	White	Widowed	0	1.5	20	30	9	29	24	4	6	85.7143	5	41	73	4	50318	5.95443	3.19149	4746	845051	2093	12001	13292	1576630				1.11648
C85	bl	LMCI	82.7	Male	20	Not Hisp/Latino	White	Married	1	1.5	7.33	9.33	2	28	39	2	8	100	4	32	93	5	66882	6.46003	4.06002		1035320				1647330	545.1	155.4	14.62
C86	bl	LMCI	80.5	Male	15	Not Hisp/Latino	White	Married	0	2.5	6	12	5	27	22	-1	4	100	3	37	158	15	42203	5.06937	2.99565	5949	832509	3213	14301	17021	1408810				1.19855
C87	bl	LMCI	83.6	Female	18	Not Hisp/Latino	White	Married	0	1	9.33	18.33	9	27	30	1	4	66.6667	1	46	76	0	27883	3.0516	1.99815		913716				1395440
C88	bl	LMCI	68	Female	15	Not Hisp/Latino	White	Married	1	2	12.67	19.67	6	28	25	-1	5	100	0	28	228	20	35256	3.89041	2.35503	6228	906228	3394	19055	15821	1497050	627.4	435.6	49.12
C89	bl	LMCI	70.9	Male	18	Not Hisp/Latino	White	Married	0	1	6.67	9.67	3	30	52	9	0	0	6	60	66	8	24539	2.06696	1.33786	8920	1187200	4620	20346	25678	1834200
C90	bl	LMCI	63.9	Male	17	Not Hisp/Latino	White	Married	1	1	7.67	11.67	4	24	39	0	3	42.8571	4	42	66	0	43977	3.48584	2.24539	7634	1261590	4160	16741	26705	1958550	1100	151.6	14.57
C91	bl	LMCI	75.8	Female	14	Not Hisp/Latino	White	Married	1	1.5	16.67		10	26	23	3	6	100	1	30	300	6	30916	3.55141	2.14282	6140	870528	3671	13972	14655	1442770	477.6	347	36.47
C92	bl	LMCI	75	Male	14	Not Hisp/Latino	White	Married	0	2.5	6.33	14.33	6	28	34	4	5	62.5	3	32	196	10	35019	3.16147	1.86877	6529	1107680	4058	14919	17639	1873910	338.4	172.6	16.04
C93	bl	LMCI	82.5	Male	13	Not Hisp/Latino	White	Married	1	2	15.33	22.33	7	25	23	3	5	83.3333	4	39	173	0	27495	2.77909	1.79513	6517	989354	3090	17053	22717	1531640				1.23127
C94	bl	LMCI	73.5	Male	12	Not Hisp/Latino	White	Married	0	1.5	8.67	17.67	7	27	34	4	7	77.7778	4	29	107	0	26124	2.68945	1.71359		971350				1524520
C95	bl	LMCI	78.2	Male	16	Not Hisp/Latino	White	Married	1	1	12	21	8	28	31	0	6	100	0	55	108	0	23532	2.30293	1.51052	5067	1021830	2770	17223	20612	1557870	455.1	583.3	62.83	1.26424
C96	bl	LMCI	76.4	Male	16	Not Hisp/Latino	White	Married	1	1	9.67	14.67	5	29	22	4	6	85.7143	7	39	130	5	36026	3.04969	1.98235	7186	1181300	3262	22299	19883	1817340				1.28008
C97	bl	LMCI	73.8	Female	18	Not Hisp/Latino	White	Married	0	1.5	5.67	11.67	6	30	45	3	1	11.1111	8	64	54	2	29043	2.90311	1.877	7467	1000410	4027	17524	18971	1547310	>1700	238.3	22.1	1.20813
C98	bl	LMCI	79.4	Female	9	Not Hisp/Latino	White	Widowed	0	1	14	23	7	26	14	5	2	40	4	22	236	0	28087	3.5307	2.28844	5561	795508	2634	13653	13939	1227340	730.1	443.4	44.42
C99	bl	LMCI	72.8	Female	12	Not Hisp/Latino	White	Divorced	1	2	7.33	10.33	3	28	44	9	8	61.5385	3	29	112	1	30521	3.14358	2.21138	6138	970900	3204	17913	17592	1380180	421.3	375	37.03	1.16
C100	bl	LMCI	81.4	Male	19	Not Hisp/Latino	White	Married	0	1.5	12	18	5	28	30	-1	3	60	7	30	216	7	27823	2.94784	1.75425		943843				1586030
C101	bl	LMCI	74	Female	18	Not Hisp/Latino	White	Widowed	0	0.5	6	9	3	30	30	0	5	100	8	34	111	1	28209	3.06915	1.95373	6630	919115	4020	13809	16797	1443850				1.2838
C102	bl	LMCI	81.2	Female	16	Not Hisp/Latino	White	Divorced	0	0.5	9	11	1	29	49	6	3	25	5	49	75	1	27225	2.9809	2.03763		913315				1336110	915	211.1	19.88
C103	bl	LMCI	72.6	Male	12	Not Hisp/Latino	White	Married	1	2.5	10.67	17.67	7	29	33	2	5	71.4286	4	54	66	8	37397	3.1573	1.95955	5067	1184460	2696	18660	21653	1908450				1.1947
C104	bl	LMCI	73.9	Male	12	Not Hisp/Latino	White	Married	0	0.5	11.33	22.33	10	27	31	2	7	100	4	24	86	4	49959	4.60456	2.98418	5832	1084990	3400	19856	20936	1674130	817	466.4	47.6	1.25379
C105	bl	LMCI	75.1	Male	14	Not Hisp/Latino	White	Married	0	1.5	18.67	28.67	10	29	23	3	6	100	1	38	54	3	69527	6.17716	3.79131	5537	1125550	2054	16335	20632	1833850
C106	bl	LMCI	78.8	Male	18	Not Hisp/Latino	White	Married	1	2	14.67	24.67	9	27	22	2	3	60	3	39	83	10	83680	8.61467	4.95127		971366				1690070	674.5	313	32.01
C107	bl	LMCI	69	Female	16	Not Hisp/Latino	White	Married	1	2.5	6.67	12.67	6	28	35	2	7	100	0	45	67	8	36353	3.95066	2.50229	6132	920176	3294	14681	17825	1452790	482.9	521.8	56.81	1.13609
C108	bl	LMCI	71.2	Male	15	Not Hisp/Latino	White	Married	1	2	14.33	21.33	5	25	31	4	5	62.5	4	26	109	4	58697	4.89717	3.23599	7225	1198590	2848	18848	21677	1813880	332.6	335.7	31.59
C109	bl	LMCI	77.8	Male	11	Not Hisp/Latino	Black	Married	1	2.5	19.33	27.33	6	29	27	3	6	85.7143	4	5	300	14	71910	8.13534	4.8974	4870	883921	2657	11472	16005	1468330
C110	bl	LMCI	73.5	Male	18	Not Hisp/Latino	White	Divorced	0	0.5	8.33	11.33	3	27	31	6	7	77.7778	6	41	90	2	58261	6.24617	3.71278	7435	932747	3361	17256	20372	1569200	626.1	106.1	9.23	1.2727
C111	bl	LMCI	84.8	Male	18	Not Hisp/Latino	White	Divorced	1	1.5	8.67	13.67	4	24	37	8	5	45.4545	6	38	111	0	48762	4.98743	2.94131	6102	977698	3705	17772	18695	1657830	594	340.4	35.95	1.29125
C112	bl	LMCI	80.6	Male	18	Not Hisp/Latino	White	Married	0	1	10	18	8	26	32	1	2	28.5714	7	49	80	0	53149	5.48513	3.39099		968965				1567360
C113	bl	LMCI	68.4	Female	20	Unknown	White	Married	0	3	7.67	10.67	1	27	50	8	1	7.69231	7	11	300	2	69728	7.46936	4.47241	6898	933520	3001	14080	16070	1559070				0.873383
C114	bl	LMCI	74.3	Male	16	Not Hisp/Latino	White	Married	1	0.5	14.67	23.67	8	25	26	2	6	100	1	30	291	1	83172	7.70026	4.77547	6525	1080120	3977	18756	18335	1741650				1.16649
C115	bl	LMCI	71.2	Male	19	Not Hisp/Latino	White	Married	0	1	6	8	2	26	51	2	-2	-18.1818	2	43	106	2	38223	4.00735	2.52507		953823				1513740				1.39702
C116	bl	LMCI	74	Male	12	Not Hisp/Latino	White	Married	1	1	8	13	3	29	48	6	3	25	2	51	54	0	30261	3.14176	2.013		963186				1503280	565.2	231.8	22.75	1.36734
C117	bl	LMCI	84.2	Male	13	Not Hisp/Latino	White	Married	0	1	12.67	17.67	5	25	34	6	7	87.5	2	30	153	15	37388	4.29991	2.18304		869507				1712660	1243	175.1	15.43	1.05144
C118	bl	LMCI	76.1	Male	18	Not Hisp/Latino	White	Married	1	1	15.33	23.33	8	29	13	2	3	100	2	23	242	0	57660	6.01508	3.4826	5873	958591	2307	13548	11656	1655660
C119	bl	LMCI	54.4	Male	20	Not Hisp/Latino	White	Married	0	2	11.33	22.33	7	24	27	1	4	80	6	15	300	6	41961	3.76578	2.34933	8004	1114270	3530	18316	20633	1786080	408.4	219.9	20.62
C120	bl	LMCI	55.2	Female	18	Not Hisp/Latino	White	Married	0	2.5	16.33	26.33	9	25	16	2	4	100	3	41	60	10	38365	4.58329	3.00135	5904	837063	2697	12571	12479	1278260	449.8	289.7	31.48
C121	bl	LMCI	64.3	Female	13	Not Hisp/Latino	White	Married	1	1.5	11	15	4	28	39	3	5	55.5556	8	43	113	2	30211	3.27287	2.19435	6554	923074	3460	15210	20462	1376760
C122	bl	LMCI	64.7	Male	13	Not Hisp/Latino	Black	Divorced	1	1.5	9	18	8	26	33	3	2	25	4	31	81	0	68016	7.25934	4.13962	6815	936945	3199	15656	16936	1643050				1.12979
C123	bl	LMCI	67	Female	16	Not Hisp/Latino	White	Married	1	1.5	16	24	7	26	37	2	8	100	1	31	161	2	48187	4.74791	3.01353	5079	1014910	2331	18346	19873	1599020				1.05696
C124	bl	LMCI	67.1	Male	18	Not Hisp/Latino	White	Married	1	0.5	10	15	4	25	43	8	4	33.3333	6	49	108	0	50022	4.01509	2.67433	8581	1245850	4934	22690	24693	1870450	670.5	100.9	9.35
C125	bl	LMCI	67.7	Male	16	Not Hisp/Latino	White	Married	0	1	10.67	18.67	6	27	35	6	2	20	4	29	66	2	45537	4.4227	2.92572	8110	1029620	3567	15316	22758	1556440				1.02522
C126	bl	LMCI	67.8	Female	16	Not Hisp/Latino	White	Married	1	1	4	11	6	29	35	1	2	33.3333	2	27	198	4	48322	4.83873	2.92591	6124	998650	2177	14506	19158	1651520	912	261.8	23.8	1.18989
C127	bl	LMCI	68.1	Male	12	Not Hisp/Latino	White	Married	1	2.5	17.33	29.33	10	26	24	1	5	100	0	33	124	8	30567	2.93513	1.90458	6264	1041420	3373	19460	24773	1604920
C128	bl	LMCI	68.4	Male	16	Hisp/Latino	White	Married	0	2	7.67	13.67	6	28	30	3	5	71.4286	7	34	70	0	62647	5.11651	3.65924	6953	1224410	4391	20234	21775	1712020
C129	bl	LMCI	69	Male	20	Not Hisp/Latino	White	Married	1	2.5	13.67		10	28	21	5	2	33.3333	4	24	300	6	56507	4.71225	3.01931	8811	1199150	4294	17130	18266	1871520
C130	bl	LMCI	69.1	Male	12	Not Hisp/Latino	White	Married	1	2.5	13.33	18.33	5	29	23	1	4	80	4	33	148	8	51096	5.26639	3.14176	6899	970229	3628	18382	15716	1626350				1.24481
C131	bl	LMCI	69.9	Male	10	Not Hisp/Latino	White	Married	1	3	19.67	28.67	8	30	35	3	8	100	0	26	153	4	65872	6.83757	4.14381	5338	963383	2707	17204	18998	1589650	511.9	355	39.09
C132	bl	LMCI	71.3	Female	14	Not Hisp/Latino	White	Widowed	1	0.5	10.33	14.33	4	29	30	5	8	100	3	48	126	0	48489	4.47886	3.01292	5909	1082620	2829	15158	19899	1609370				1.18959
	0.37	132	73.2152	49	15.3485	#DIV/0!	#DIV/0!	#DIV/0!	0.515152	1.53788	11.644	18.5359	6.15909	27.0606	31.2727	3.34848	4.7803	66.5993	3.80303	37.1288	127.371	3.90152	35425.9	3.52256	2.22899	6745.85	1.01558e+06	3418.31	16821.7	18979.9	1.57433e+06	736.378	302.498	30.1227	1.21713
			7.60674		2.76009	#DIV/0!	#DIV/0!	#DIV/0!	0.501674	0.780539	4.39566	6.24734	2.37297	1.81073	8.6396	2.42438	2.47218	31.8809	2.48181	11.2164	72.6589	4.53293	15637.6	1.60645	0.918211	1123.66	119469	753.862	2461.69	3073.67	173691	335.147	114.71	13.3148	0.130021
			Difference	-1.5																			Difference	-5904.22		Difference	448.5
			Standard error	0.967																			Standard error	2142.81		Standard error	139.454
			95% CI	-3.4052 to 0.4052																			95% CI	-10124.5596 to -1683.8826		95% CI	173.8406 to 723.1594
			t-statistic	-1.551																			t-statistic	-2.755		t-statistic	3.216
			DF	249																			DF	249		DF	249
			Significance level	P = 0.1222																			Significance level	P = 0.0063		Significance level	P = 0.0015
																										hippocamp 24% abs in fall si 17% abs in nonfall

## Sheet: Graphical
		TrainFall+	TrainFall-	Predict_Fall+	Predict_Fall-				DX_bl	Train_Fall+		Train_Fall-		Predict_Fall+		Predict_Fall-
		33727	29096	39605	29826				%	0.04		0.04		0.31		0.34
		48933	28917	38374	29502				Number	14		14		119		132
		49186	23152	30988	29287				AGE	76.2571	6.36127	76.2429	5.85304	74.6739	7.7148	73.2152	7.60674
		32799	20103	72746	19843				PTGENDER	5F	36%F	5F		48F	40%F	49F	37%F
		54639	20100	28970	22995				PTEDUCAT	16.9286	3.33891	16.8571	2.65611	15.9496	2.90192	15.3485	2.76009
		39550	22274	27972	41874				APOE4	0.5		0.5		0.54		0.51
		34791	16034	44428	13407				CDRSB	1.57143	1.05351	1.42857	1.15787	1.59244	0.873252	1.53788	0.780539
		24106	22443	42016	28220				MMSE	27.4286	1.86936	26.5	2.06621	27.0504	1.6967	27.0606	1.81073
		35268	27398	29769	28981				Ventricles	41145.5	15775.2	27127.3	6749.39	41330.2	18299.9	35425.9	15637.6
		33816	33122	43605	32882				%Brain	4.2043	1.59797	2.74252	0.662388	4.21119	1.91805	3.52256	1.60645
		82442	30237	26302	32637				%ICV	2.61313	0.902764	1.74986	0.369093	2.63432	1.1024	2.22899	0.918211
		29118	31282	60316	32311				Hippocampus	6255.82	923.1	6249.18	1401.95	6297.31	1080.11	6745.85	1123.66
		22695	40133	20501	36932				WholeBrain	982015	51619.2	993012	107887	991796	108146	1.01558e+06	119469
		54967	35491	42711	32394				ICV	1.56595e+06	116263	1.5458e+06	166228	1.55776e+06	160803	1.57433e+06	173691
				16636	27614
				43825	26205				Difference	-14018.2				Difference	-5904.22
				34117	32700				Standard error	4585.76				Standard error	2142.81
				12346	37735				95% CI	-23444.3559 to -4592.0441				95% CI	-10124.5596 to -1683.8826
				43102	55755				t-statistic	-3.057				t-statistic	-2.755
				50103	51791				DF	26				DF	249
				20599	40157				Significance level	P = 0.0051				Significance level	P = 0.0063
				61934	40996
				75047	55460									Difference	448.5
				44746	19315									Standard error	139.454
				26178	23815									95% CI	173.8406 to 723.1594
				69525	50663									t-statistic	3.216
				78258	45850									DF	249
				39452	33771									Significance level	P = 0.0015
				49899	39862
				54880	32543
				49416	15196
				23765	40410
				79456	12348
				61214	42631
				18841	36179
				18372	31386												Fall
				39541	59532												Age	65<		65..70		70..75		75..80		80..85		>85
				52113	28940												Number	17		14		29		25		23		11
				32492	26745												MeanAge	61.6647	2.4413	68.0357	1.33221	72.3655	1.5612	77.832	1.57975	82.1652	1.31964	86.4727	1.35358
				31921	42165												PTEDUCAT	15.4706	2.764	16.3571	3.71291	16.5172	2.79822	15.68	2.7037	15.9565	3.25406	15.2727	2.05382
				44215	22868												APOE4	0.411765		0.785714		0.758621		0.48		0.478261		0.181818
				38817	17099												CDRSB	1.79412	0.936396	1.46429	0.634407	1.67241	0.984486	1.46	0.911958	1.47826	0.714751	1.77273	1.00905
				13914	22584												MMSE	27.1176	1.79869	27.5	1.74312	27.0345	1.63626	26.92	1.80093	26.8261	1.82538	27.1818	1.32802
				22113	18167												Ventricles	38052.5	15839.2	31162.1	13155.5	43875.1	19923.1	40206	18029.3	44875.7	19519.9	47768.9	18329.9
				25539	19815												Brain%	3.53112	1.42767	2.99858	1.27246	4.39196	2.17359	4.41717	2.08408	4.65847	1.80231	4.92556	1.78298
				11480	22383												IVC%	2.24444	0.826583	1.98773	0.812159	2.74046	1.21503	2.71808	1.18412	2.88711	1.05855	3.06104	1.08844
				24146	17288												Hippocampus	6934.8	989.489	6442.5	756.2	6573.45	1171.99	5834.3	1146.9	5937	939.131	6076.33	633.156
				48734	15057										Difference	499.533	WholeBrain	1.07645e+06	126177	1.0364e+06	74453.5	1.01346e+06	94628	929180	93186.6	954988	99426	966350	87779.6
				13057	19452										Standard error	116.608	ICV	1.66498e+06	217618	1.55151e+06	105974	1.59044e+06	129956	1.47803e+06	116249	1.52912e+06	155325	1.55497e+06	203640
				15344	16103										95% CI	269.8686 to 729.1980
				19644	16684										t-statistic	4.284	NoFall
				12883	14439										DF	249	Age	65<		65..70		70..75		75..80		80..85		>85
				14815	17187										Significance level	P < 0.0001	Number	21		29		29		22		22		9
				22640	42912												MeanAge	61.6952	2.91521	68.0379	1.50176	72.6966	1.24053	77.7136	1.59919	81.9273	1.46326	86.1556	1.17379
				28738	10739												PTEDUCAT	16.1429	2.86855	15.2414	2.95991	15.4828	2.75967	14.2727	2.64002	15.4545	2.61365	15.7778	2.33333
				26186	11110												APOE4	0.52381		0.724138		0.517241		0.454545		0.272727		0.555556
				24607	16928												CDRSB	1.42857	0.779194	1.81034	0.772447	1.32759	0.723038	1.65909	0.746203	1.45455	0.72225	1.5	1.08972
				26273	19314												MMSE	26.9524	1.98686	26.8621	1.70554	27.4483	1.97459	27.5909	1.56324	26.3636	1.81385	27.1111	1.45297
				16488	16683												Ventricles	28748.7	12378.7	34036.2	16914.1	36299.1	14725.9	36640.7	19023.4	37100.3	14169.9	45608.4	11342.6
				13932	28442												Brain%	2.76215	1.32086	3.26143	1.66604	3.46508	1.34326	3.69997	2.00971	3.99848	1.47144	4.72646	1.21007
				26778	27801												IVC%	1.8112	0.735196	2.11997	0.988661	2.23696	0.809734	2.31602	1.13554	2.44556	0.851157	2.78728	0.671005
				29159	23834												Hippocampus	7434.33	857.636	6775.86	970.927	6943.91	1089.51	6665.45	1280.07	5921.14	938.148	5657.17	887.067
				24843	24512												WholeBrain	1.05724e+06	135718	1.04697e+06	115319	1.04339e+06	93118.5	1.00692e+06	138617	925401	74358	969243	99541.7
				25163	32122												ICV	1.5813e+06	207251	1.57866e+06	157751	1.60426e+06	154022	1.57407e+06	209470	1.49898e+06	141945	1632430	159940
				29915	21798
				76968	20358													Difference	-9303.76	Difference	-2874.03	Difference	-7576.03	Difference	-3565.31	Difference	-7775.33
				60380	28693													Standard error	4574.92	Standard error	4703.74	Standard error	4600.53	Standard error	5408	Standard error	5104.66
				48085	28718													95% CI	-18582.1266 to -25.3849	95% CI	-12373.4177 to 6625.3586	95% CI	-16792.0124 to 1639.9434	95% CI	-14457.5806 to 7326.9552	95% CI	-18069.8537 to 2519.1857
				33881	18937													t-statistic	-2.034	t-statistic	-0.611	t-statistic	-1.647	t-statistic	-0.659	t-statistic	-1.523
				85816	26125													DF	36	DF	41	DF	56	DF	45	DF	43
				38990	15307													Significance level	P = 0.0494	Significance level	P = 0.5446	Significance level	P = 0.1052	Significance level	P = 0.5131	Significance level	P = 0.1350
				63683	23506
				39345	31060
				33863	20651													65<	65..70	70..75	75..80	80..85	>85
				35570	16833												Fall+	38052.5	34036.2	43875.1	40206	44875.7	47768.9	41469.1
				47636	27506												Fall-	28748.7	31162.1	36299.1	36640.7	37100.3	45608.4	35926.6
				30669	39893
				81288	51004
				53980	55742
				55817	56248
				57158	44091
				31693	52834
				38540	31539
				32328	50318
				30268	66882
				35281	42203
				32069	27883
				24473	35256
				27286	24539
				29760	43977
				34945	30916
				60398	35019
				61517	27495
				60470	26124
				99907	23532
				37297	36026
				45737	29043
				40289	28087
				42605	30521
				48100	27823
				54911	28209
				54036	27225
				37727	37397
				39315	49959
				42345	69527
				42129	83680
				40063	36353
				55108	58697
				46104	71910
				50741	58261
				41968	48762
				56230	53149
				61769	69728
				44622	83172
				61086	38223
				42408	30261
				54752	37388
				79350	57660
				82030	41961
					38365
					30211
					68016
					48187
					50022
					45537
					48322
					30567
					62647
					56507
					51096
					65872
					48489
